# Supplementary material for: ALPK1 controls TIFA/TRAF6-dependent innate immunity against heptose-1,7-bisphosphate of gram-negative bacteria
Source: PubMed Central journal article supplement (PMC5336308; doi:10.1371/journal.ppat.1006224), 2017-02-21
Supplement: ppat.1006224.s001.pdf [file ppat.1006224.s001.pdf]

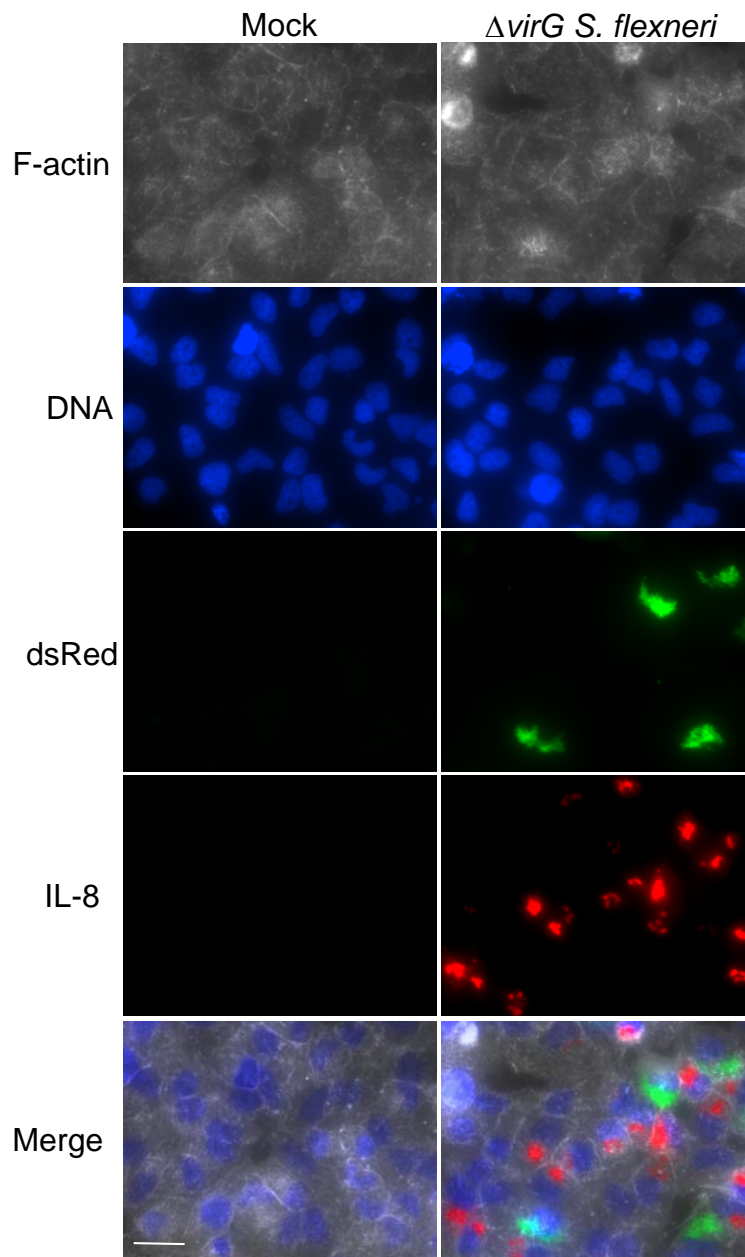

**Figure S1: Images illustrating the assay of the RNAi screen.**

HeLa cells were infected for 3.5 hours with *S. flexneri*  $\Delta virG$  expressing dsRed under the control of the *uhpT* promoter (in green). After fixation, cells were stained for F-actin (in grey), DNA (in blue) and IL-8 (in red). Scale bars, 20  $\mu$ m.
