# Supplementary material for: ALPK1 controls TIFA/TRAF6-dependent innate immunity against heptose-1,7-bisphosphate of gram-negative bacteria
Source: PubMed Central journal article supplement (PMC5336308; doi:10.1371/journal.ppat.1006224), 2017-02-21
Supplement: ppat.1006224.s002.pdf [file ppat.1006224.s002.pdf]

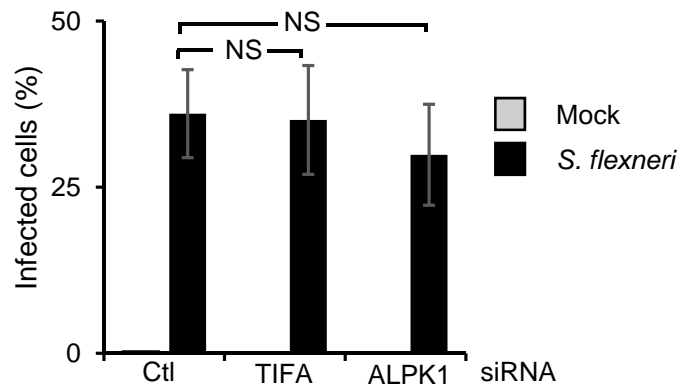

**Figure S2: Silencing TIFA or ALPK1 has no significant effect on *S. flexneri* entry**

HeLa cells were transfected for 72 hours with control, TIFA or ALPK1-targeting siRNAs. HeLa cells were infected for 3.5 hours with  $\Delta virG$  *S. flexneri* expressing dsRed. After fixation, cells were stained for F-actin and DNA. Infection rate was evaluated by automated image analysis. Data correspond to the mean  $\pm$  SD of 3 independent experiments, NS = non-significant  $p > 0.05$ .

Figure S2
