# Supplementary material for: ALPK1 controls TIFA/TRAF6-dependent innate immunity against heptose-1,7-bisphosphate of gram-negative bacteria
Source: PubMed Central journal article supplement (PMC5336308; doi:10.1371/journal.ppat.1006224), 2017-02-21
Supplement: ppat.1006224.s003.pdf [file ppat.1006224.s003.pdf]

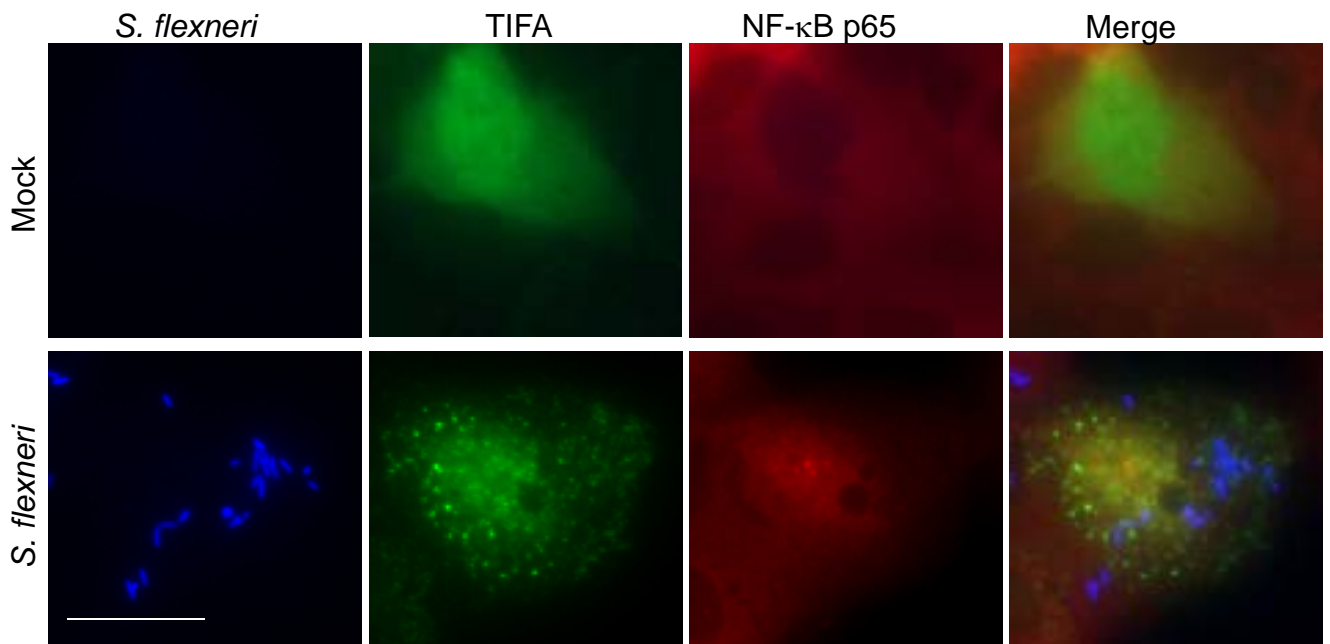

**Figure S3: TIFA oligomerization after *S. flexneri* infection of Caco-2 cells.**

Caco-2 cells were transfected with a wild-type TIFA cDNA construct and infected for 3 hours with  $\Delta virG$  *S. flexneri* expressing dsRed (in blue). After fixation, they were co-stained for TIFA (in green) and NF- $\kappa$ B p65 (in red). Scale bars, 20  $\mu$ m.
