# Supplementary material for: ALPK1 controls TIFA/TRAF6-dependent innate immunity against heptose-1,7-bisphosphate of gram-negative bacteria
Source: PubMed Central journal article supplement (PMC5336308; doi:10.1371/journal.ppat.1006224), 2017-02-21
Supplement: ppat.1006224.s004.pdf [file ppat.1006224.s004.pdf]

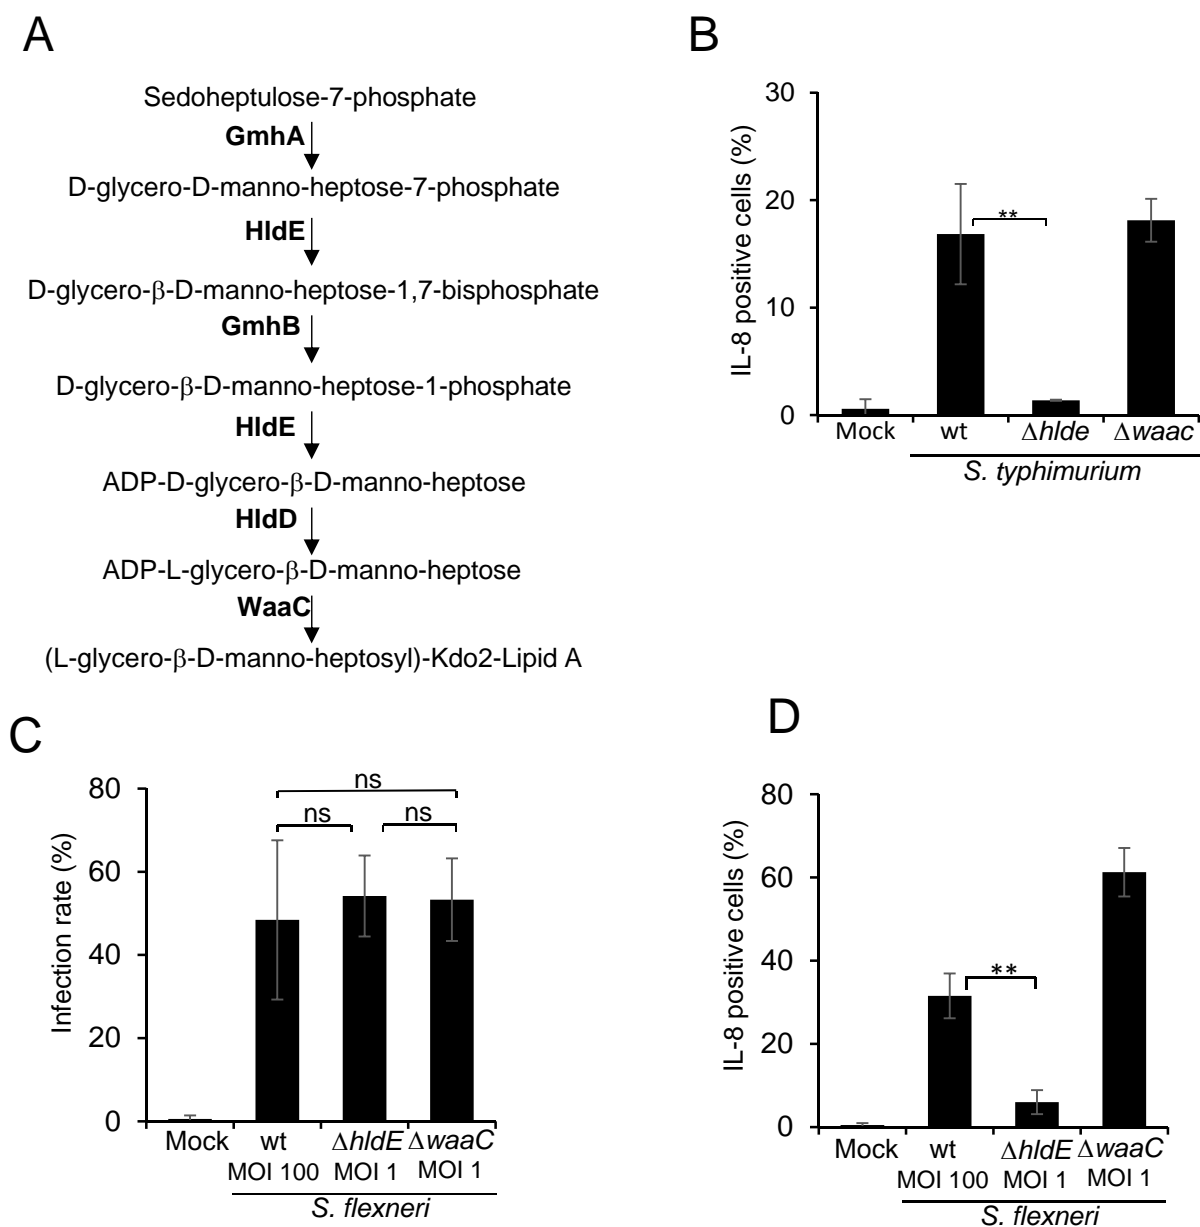

**Figure S4: *S. typhimurium* and *S. flexneri*-induced IL-8 production is largely HBP-dependent.**

**A)** ADP-Heptose biosynthetic pathway. **B)** *S. typhimurium*-induced IL-8 production is largely HBP-dependent. HeLa cells were infected with *S. typhimurium* for 4 hours, fixed and stained for intracellular IL-8. Data correspond to the mean  $\pm$  SD of three independent experiments,  $p^{**} < 0.005$ . **C)** Infectivity of wt,  $\Delta hldE$  and  $\Delta waaC$  *S. flexneri*. HeLa cells were infected with wt (MOI 100),  $\Delta hldE$  (MOI 1) and  $\Delta waaC$  (MOI 1) *S. flexneri* expressing dsRed. The rate of infection was quantified automatically. Data correspond to the mean  $\pm$  SD of three independent experiments, non-significant  $p > 0.05$ . **D)** *S. flexneri*-induced IL-8 production is largely HBP-dependent. HeLa cells were infected with *S. flexneri* for 4 hours, fixed and stained for intracellular IL-8. Data correspond to the mean  $\pm$  SD of three independent experiments,  $p^{**} < 0.005$ .
