# Supplementary material for: ALPK1 controls TIFA/TRAF6-dependent innate immunity against heptose-1,7-bisphosphate of gram-negative bacteria
Source: PubMed Central journal article supplement (PMC5336308; doi:10.1371/journal.ppat.1006224), 2017-02-21
Supplement: ppat.1006224.s005.pdf [file ppat.1006224.s005.pdf]

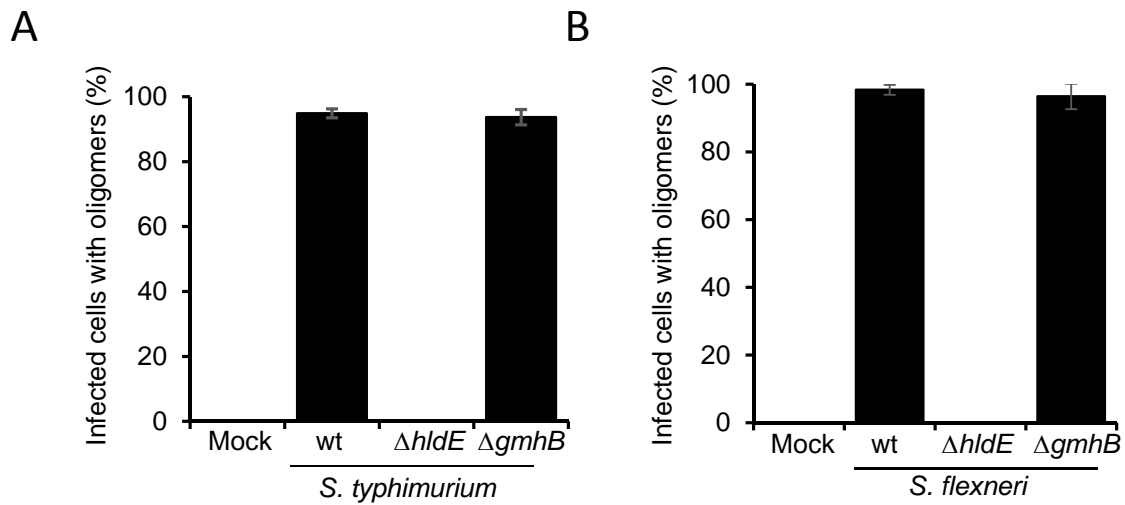

**Figure S5: TIFA oligomerization is HBP-dependent.**

**A)** HeLa cells were transfected with a wild-type TIFA cDNA construct. After 24 hours, they were infected with wild-type,  $\Delta hldE$  or  $\Delta gmhB$  *S. typhimurium* expressing dsRed under the control of the *uhpT* promoter. The fraction of infected cells showing TIFA punctuates was manually evaluated. Data correspond to the mean  $\pm$  SD of 3 independent experiments.

**B)** HeLa cells were transfected with a wild-type TIFA cDNA construct. After 24 hours, they were infected with wild-type,  $\Delta hldE$  or  $\Delta gmhB$  *S. flexneri* expressing dsRed. The fraction of infected cells showing TIFA punctuates was manually evaluated. Data correspond to the mean  $\pm$  SD 3 independent experiments.
