# Supplementary material for: ALPK1 controls TIFA/TRAF6-dependent innate immunity against heptose-1,7-bisphosphate of gram-negative bacteria
Source: PubMed Central journal article supplement (PMC5336308; doi:10.1371/journal.ppat.1006224), 2017-02-21
Supplement: ppat.1006224.s006.pdf [file ppat.1006224.s006.pdf]

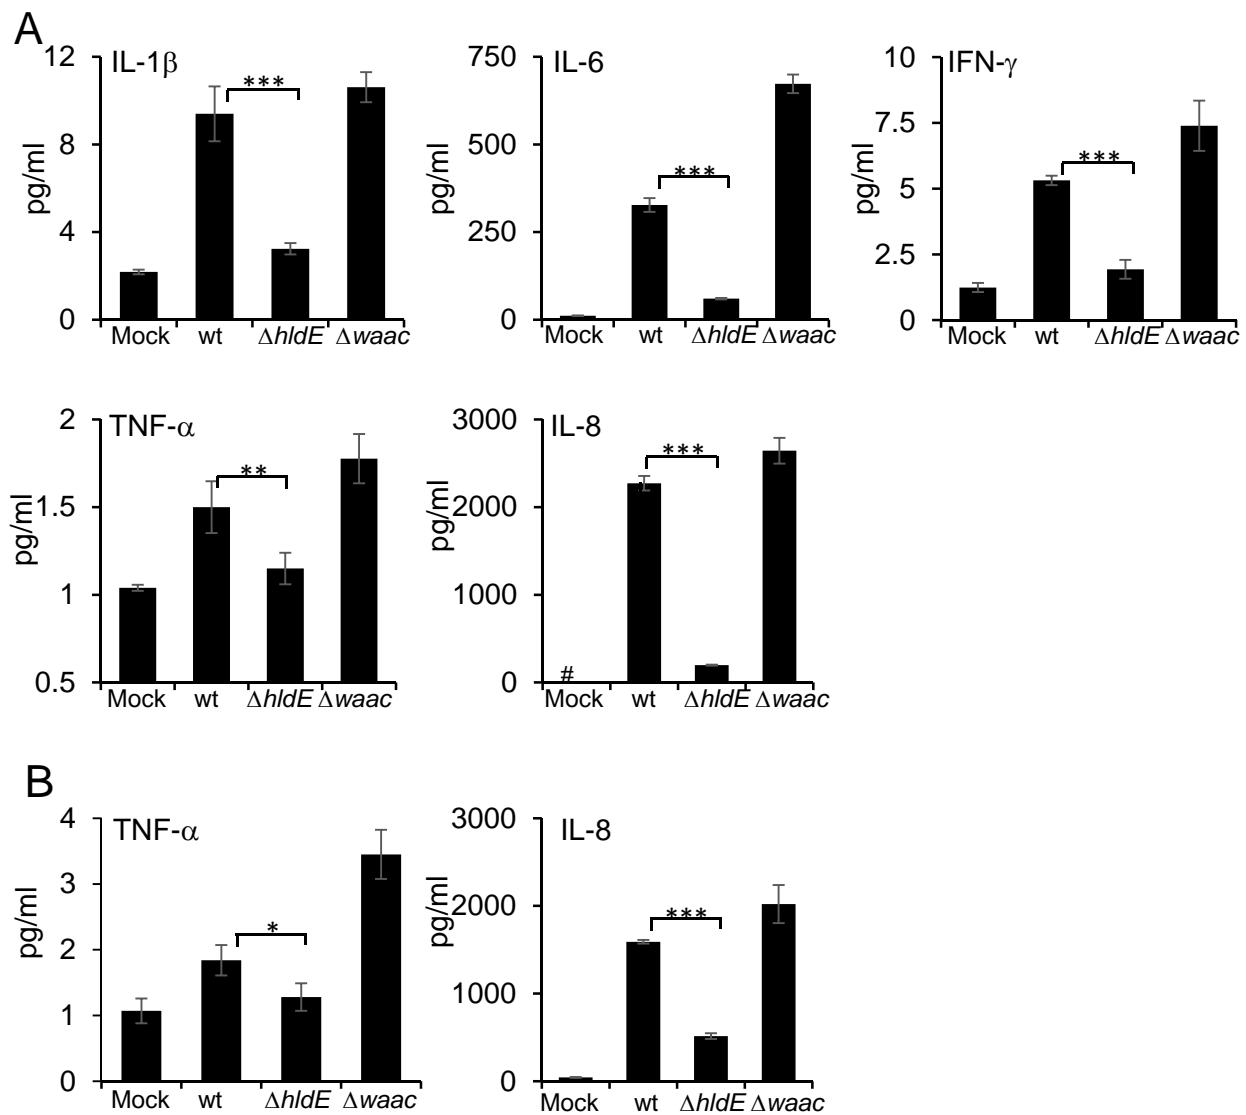

**Figure S6: The production of cytokines induced by *S. flexneri* infection is largely HBP-dependent.**

**A)** HeLa cells were infected or not with *S. flexneri* for 6 hours with wt (MOI 10),  $\Delta hldE$  (MOI 0.1) and  $\Delta waaC$  (MOI 0.1) *S. flexneri*. Cytokine secretion was measured in the supernatant of infected cells by a multiplex cytokine assay. Data correspond to the mean  $\pm$  SD of triplicates,  $p^{**} < 0.005$ ,  $p^{***} < 0.0005$ . # indicates not detected. **B)** Caco-2 cells were infected or not with *S. flexneri* for 6 hours with wt (MOI 10),  $\Delta hldE$  (MOI 0.1) and  $\Delta waaC$  (MOI 0.1) *S. flexneri*. Cytokine secretion was measured in the supernatant of infected cells by a multiplex cytokine assay. Data correspond to the mean  $\pm$  SD of triplicates,  $p^{**} < 0.005$ . IL-1 $\beta$ , IFN $\gamma$  and IL-6 were not detected in Caco-2 cells.

Figure S6
