# Supplementary material for: ALPK1 controls TIFA/TRAF6-dependent innate immunity against heptose-1,7-bisphosphate of gram-negative bacteria
Source: PubMed Central journal article supplement (PMC5336308; doi:10.1371/journal.ppat.1006224), 2017-02-21
Supplement: ppat.1006224.s007.pdf [file ppat.1006224.s007.pdf]

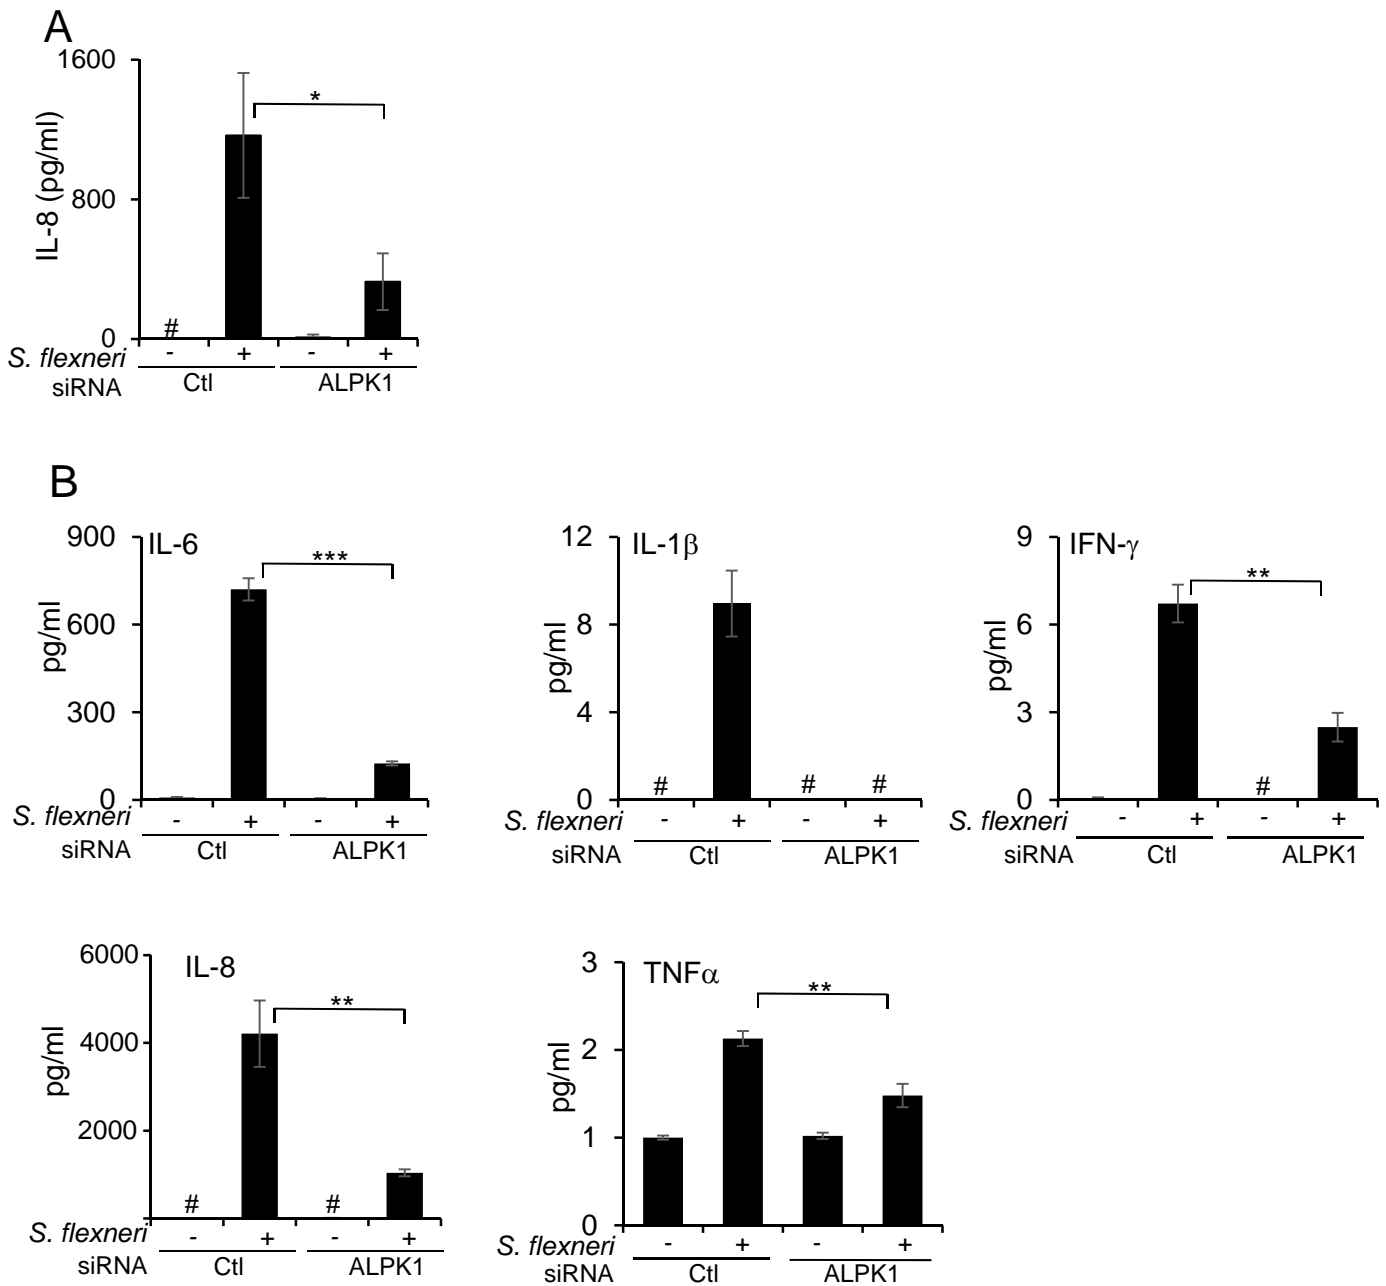

**Figure S7: The production of cytokines induced by *S. flexneri* infection depends on ALPK1.**

**A)** ELISA assay showing that *S. flexneri*-induced IL-8 expression is ALPK1-dependent. HeLa cells were transfected with control or ALPK1 siRNA, and infected or not with *S. flexneri* for 6 hours. IL-8 secretion was measured in the supernatant of infected cells by ELISA. Data correspond to the mean  $\pm$  SD of three independent experiments,  $p^* < 0.05$ . **B)** HeLa cells were transfected with control or ALPK1 siRNA, and infected or not with *S. flexneri* for 6 hours. Cytokine secretion was measured in the supernatant of infected cells by a multiplex cytokine assay. Data correspond to the mean  $\pm$  SD of triplicates,  $p^{**} < 0.005$ ,  $p^{***} < 0.0005$ . # indicates not detected.
