# Supplementary material for: ALPK1 controls TIFA/TRAF6-dependent innate immunity against heptose-1,7-bisphosphate of gram-negative bacteria
Source: PubMed Central journal article supplement (PMC5336308; doi:10.1371/journal.ppat.1006224), 2017-02-21
Supplement: ppat.1006224.s008.pdf [file ppat.1006224.s008.pdf]

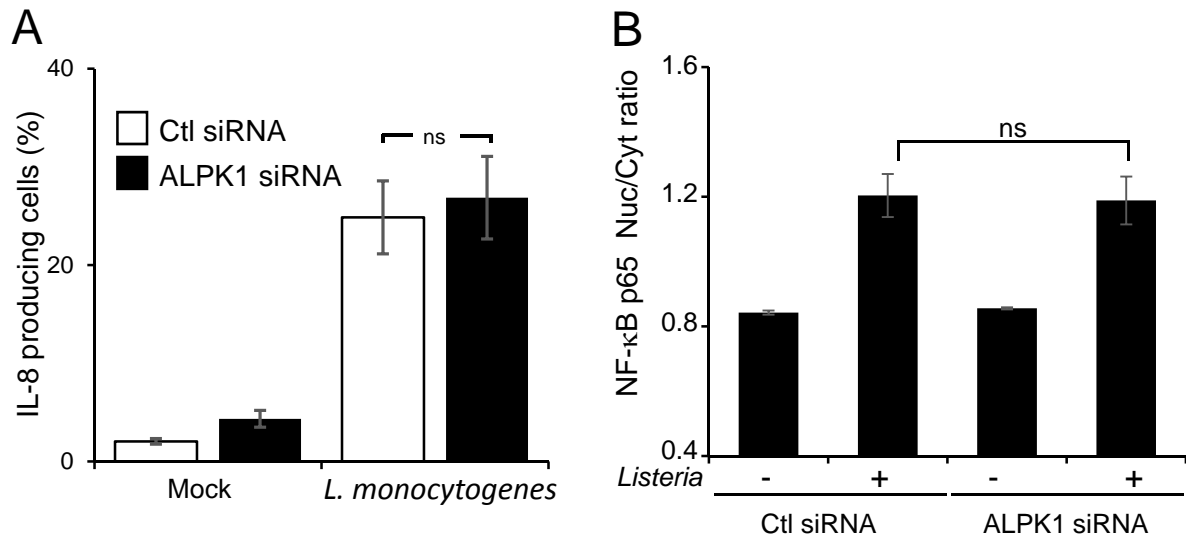

**Figure S8: ALPK1 is not involved in *L. monocytogenes*-induced inflammation**

**A)** ALPK1 is not involved in *L. monocytogenes*-induced IL-8 expression. HeLa cells were transfected for 72 hours with control or ALPK1-targeting siRNAs and infected for 3.5 hours with *L. monocytogenes* expressing GFP. After fixation, cells were stained for F-actin, DNA, and IL-8. IL-8 was quantified by automated image analysis. Data correspond to the mean  $\pm$  SD of triplicate wells, graph representative of 3 independent experiments, ns: non-significant  $p > 0.05$ . **B)** ALPK1 is not involved in *L. monocytogenes*-induced NF- $\kappa$ B activation. Cells were treated as in A but stained for NF- $\kappa$ B p65 after one hour of infection. Quantification of the NF- $\kappa$ B p65 nuclear/cytoplasmic fluorescence intensity ratio. Data show the mean  $\pm$  SD of three independent experiments, ns: non-significant  $p > 0.05$ .
