# Supplementary material for: ALPK1 controls TIFA/TRAF6-dependent innate immunity against heptose-1,7-bisphosphate of gram-negative bacteria
Source: PubMed Central journal article supplement (PMC5336308; doi:10.1371/journal.ppat.1006224), 2017-02-21
Supplement: ppat.1006224.s009.pdf [file ppat.1006224.s009.pdf]

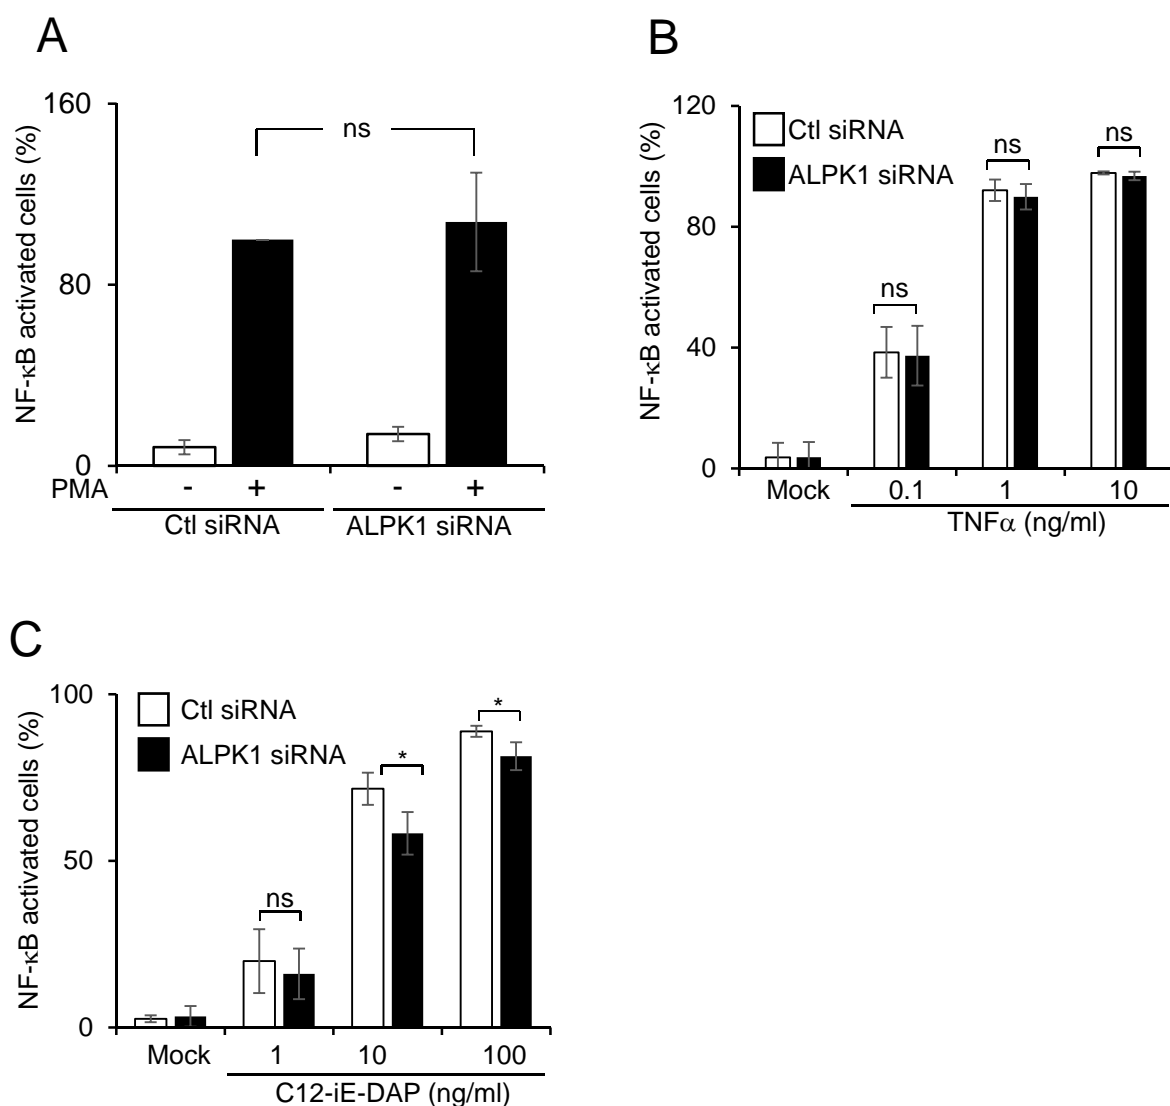

**Figure S9: Roles of ALPK1 in different pathways activating NF-κB.**

**A)** ALPK1 depletion has no effect on PMA-induced NF-κB activation. Cells were transfected with control or ALPK1 siRNAs, stimulated with PMA (100 ng/ml) for 1 hour and stained for NF-κB p65. Data show the mean +/- SD of three independent experiments, ns: non-significant  $p > 0.05$ . **B)** ALPK1 depletion has no effect on TNFα-induced NF-κB activation. Cells were treated as in A and stimulated with indicated concentrations of TNFα for 30 min. Data show the mean +/- SD of three independent experiments, ns: non-significant  $p > 0.05$ . **C)** ALPK1 depletion has a moderate inhibitory effect on C12-iE-DAP-induced NF-κB activation. Cells were treated as in A and stimulated with indicated concentrations of C12-iE-DAP for 1 hour. Data show the mean +/- SD of three independent experiments, ns: non-significant  $p > 0.05$ ,  $p^* < 0.05$ .
