# Supplementary material for: ALPK1 controls TIFA/TRAF6-dependent innate immunity against heptose-1,7-bisphosphate of gram-negative bacteria
Source: PubMed Central journal article supplement (PMC5336308; doi:10.1371/journal.ppat.1006224), 2017-02-21
Supplement: ppat.1006224.s010.pdf [file ppat.1006224.s010.pdf]

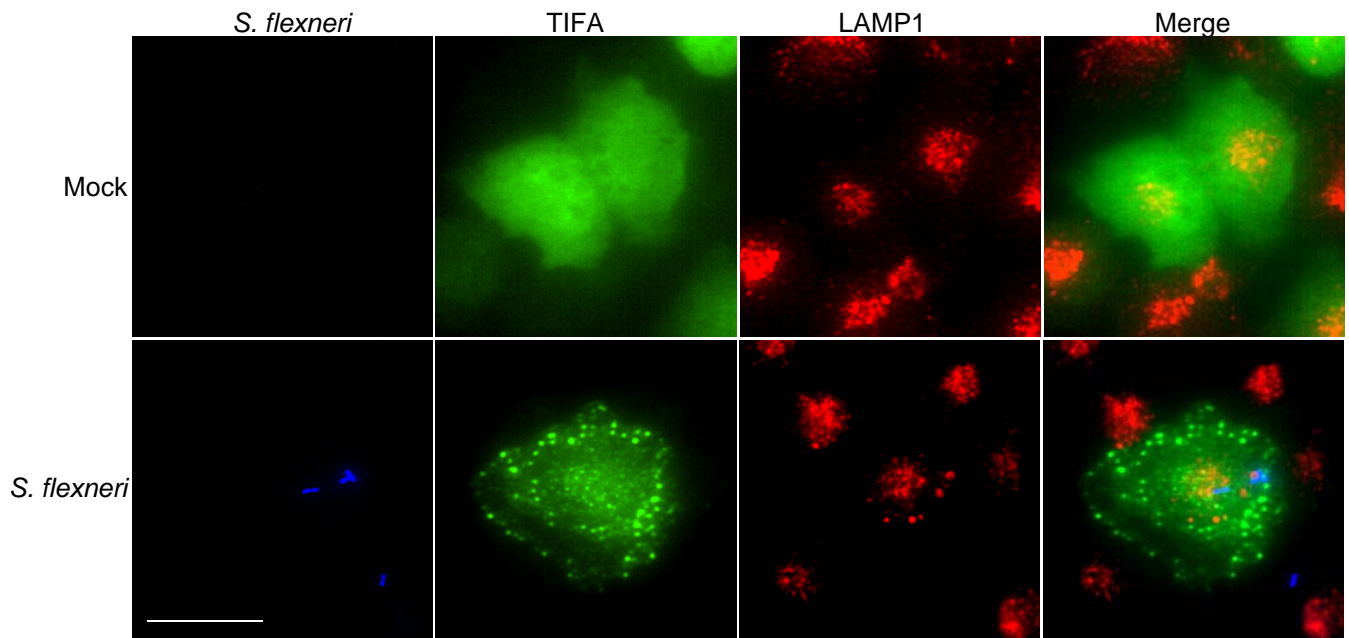

Figure S10: TIFA oligomers are not co-localized with *Lysosomal*-associated membrane protein 1 (*LAMP-1*). HeLa cells were left uninfected or infected for 1 hour with *S. flexneri* expressing dsRed at MOI 0.5. Cells were stained for TIFA and LAMP1. Bar, 10  $\mu$ m.
