# Supplementary material for: ALPK1 controls TIFA/TRAF6-dependent innate immunity against heptose-1,7-bisphosphate of gram-negative bacteria
Source: PLoS Pathog. 2017 Feb 21;13(2):e1006224. doi: 10.1371/journal.ppat.1006224 (PMC5336308; doi:10.1371/journal.ppat.1006224)
Supplement: S1 Table — Z-scored values of total cell counts, infection rates and IL-8 measurements obtained with CellProfiler for all genes targeted by the siRNA library (see Materials and Methods). Data correspond to the mean of duplicate screening data. TIFA, TRAF6 and ALPK1 are shown in red. The positive controls RelA (NF-κB p65) and MAP3K7 (TAK1) are shown in blue. (XLSX) [file ppat.1006224.s011.xlsx]

## Sheet: Feuil1
Table S1: Table showing the results of the RNAi screen
GeneName	Cell counts (Z score)	Infection rate (Z score)	IL-8 (Z score)
KCNK1	-0.07839	-0.51845	-2.0448
GNPDA1	-1.12625	0.12955	-2.02305
RAC1	0.886065	-0.77175	-1.95815
RIMS3	1.21072	-1.13733	-1.9434
TIFA	0.13651	1.6204	-1.91115			Table S1: Table showing the results of the RNAi screen
ATG16L2	0.7945	-0.918505	-1.8995			Data show Z-scored values of total cell counts, infection rates and IL-8 measurements
SNX32	-0.821916	-0.398595	-1.89345			obtained with CellProfiler for all genes targeted by the siRNA library (see Experimental
GGA3	0.490975	-1.968	-1.8614			procedures). Data correspond to the mean of duplicate screening data. TIFA, TRAF6
EIF2C3	0.29043	-2.31095	-1.84755			and ALPK1 are shown in red. The positive controls RelA (NF-B p65) and MAP3K7
SCAMP5	-0.027093	-1.47684	-1.84125			(TAK1) are shown in blue.
HNRNPR	0.91246	-1.05277	-1.82715
FKBP6	-1.19142	-0.413205	-1.81525
CCDC19	-0.800935	-3.2996	-1.8123
FBL	-0.36844	0.485605	-1.78625
OSBPL5	-0.2769	-0.174915	-1.7844
MAP2K2	0.45527	-0.93616	-1.78425
GLT8D1	0.370405	-0.84757	-1.78235
C14orf101	0.841755	-2.262	-1.7715
SH3GLB2	0.504695	0.308216	-1.77135
SF1	0.59137	-0.966385	-1.771
ACCS	1.58944	0.702205	-1.7684
ITGB1BP2	0.518576	-2.1711	-1.76015
NGFRAP1	0.155525	-1.11367	-1.75845
SMARCE1	1.05791	-0.90452	-1.7416
RAB3B	-0.19888	-0.780975	-1.73785
SLC25A12	0.102614	0.53849	-1.7298
CD5	0.962275	-1.06639	-1.7266
ZNF70	0.729405	-0.93507	-1.7261
STX11	0.215055	0.496215	-1.723
LRRC66	0.555085	-0.144555	-1.72165
MAP3K7	1.0877	0.00655	-1.7088
ZNF750	0.162275	-1.4598	-1.7011
ING1	1.6608	-1.3881	-1.6968
OR11H4	1.05356	-1.8945	-1.69415
NUP85	-0.52094	0.13747	-1.69385
UBL4B	0.884935	-1.07676	-1.69055
WFIKKN1	0.3858	0.59952	-1.68925
KCNA2	0.430625	-0.89106	-1.68785
TRIB3	-0.362396	0.01634	-1.68655
DOCK8	-1.2643	-0.188807	-1.68345
CATSPER1	-0.092165	-0.524715	-1.68215
GRINA	0.36623	-1.08353	-1.67995
HCFC2	0.155361	-0.57441	-1.67215
METRN	-1.41985	-0.18403	-1.6695
LOC284009	0.71238	-2.07615	-1.66495
WT1	0.115085	-0.749765	-1.6624
C17orf78	-0.982135	-0.716785	-1.6613
CXorf1	1.09082	0.2414	-1.66105
PKHD1L1	-0.27827	-0.50391	-1.65755
LCN12	0.424575	-1.35918	-1.65635
NPM2	-0.736805	-1.61425	-1.64615
KCND3	-0.884095	-0.02365	-1.6433
FAM120A	-0.682727	-0.438585	-1.64215
RIN2	0.816225	-1.3989	-1.64195
APOH	-1.24981	1.28493	-1.64055
SULT2A1	1.06702	-0.535195	-1.63855
ECH1	0.238	-1.0991	-1.63795
SRSF1	-0.019405	0.02264	-1.63575
GRAMD1A	-1.1286	-1.37748	-1.6317
ITM2C	-1.16722	-1.27055	-1.6296
AVL9	1.01158	-0.538865	-1.6292
ZNF474	0.508705	-0.056125	-1.62805
TFDP3	-0.79987	-0.365795	-1.62775
PSKH2	1.05545	-0.682275	-1.62705
UTP18	-0.04688	-1.16345	-1.6257
LHFP	-0.830155	-2.25845	-1.62175
CCDC144NL	0.654985	-0.18136	-1.6207
CPNE2	0.62985	0.304794	-1.6204
SUPT16H	0.846075	0.692305	-1.61335
RXRB	-0.155105	-1.37385	-1.61305
STRN3	0.035892	-1.84145	-1.6125
KNCN	-0.7178	-0.306755	-1.6123
SAFB	0.754405	0.440595	-1.6102
ANXA4	0.76048	-2.39565	-1.6102
PPP2R5D	-0.08784	-1.3356	-1.60905
CFL2	-0.361745	-0.45516	-1.60365
RAPGEF3	0.74093	-1.38954	-1.6036
MORC2	-0.382195	-2.0293	-1.6034
UBR4	-1.01093	-0.216415	-1.6027
DCD	-0.99782	0.595655	-1.6016
IMP4	-0.548495	-0.60251	-1.60135
SLC28A2	0.33357	-2.58335	-1.5905
RELA	0.24936	0.93379	-1.5892
ANGPTL4	-0.678205	0.13325	-1.5871
CCDC121	-0.746428	1.517	-1.58575
IKBKG	0.787705	-1.2764	-1.58515
ALOX15B	-1.03531	-0.142318	-1.58475
EGFL6	0.244934	0.903125	-1.5808
TFAP2E	0.335275	-0.682185	-1.58055
RAB2A	0.178299	-0.83123	-1.5721
CLK3	1.23255	-0.669395	-1.57175
TMEM18	0.056975	0.622775	-1.5717
G0S2	0.972905	-1.29458	-1.5694
DCLK2	0.74038	-1.54135	-1.56875
SCNN1D	0.214655	-2.58735	-1.56705
CNKSR3	-0.96963	0.031205	-1.56485
SCIN	1.00581	-0.144546	-1.56465
PSMG2	0.72215	-1.2529	-1.56415
PLAT	-0.161655	-1.43429	-1.56285
ESPN	-1.25423	-1.06578	-1.56115
BCHE	0.881565	-1.05878	-1.5581
BNIPL	0.135323	-1.59705	-1.55795
ZMIZ2	1.0836	-1.09956	-1.55785
IGFLR1	0.458635	0.385605	-1.55755
TIPIN	0.167326	-2.30755	-1.55525
RD3	-0.29399	-1.01389	-1.55405
NHS	-0.87343	0.15683	-1.5532
IQCD	-0.103085	-1.42928	-1.55275
CHST5	-0.64759	-1.6902	-1.55115
MAPK10	-0.091375	-0.44521	-1.5488
MYOZ1	0.40245	-1.3881	-1.54495
HRH4	1.48315	-0.924815	-1.54475
MYO1B	-0.33544	-0.712015	-1.54395
TNFRSF12A	-0.771595	-1.1575	-1.54272
PVR	-0.737775	0.0433815	-1.54205
CDC40	-1.8989	0.219845	-1.5419
PEX14	1.00771	-0.104953	-1.5418
MET	-0.862775	-0.344165	-1.53995
RPL27	-1.9649	-0.514635	-1.5386
BAMBI	0.389565	-1.20844	-1.5356
SLC25A39	0.36124	-1.12831	-1.5349
EPHB1	0.401415	-0.512631	-1.5341
RPS4Y1	-1.6148	0.226114	-1.5339
ZNF593	0.65749	-1.13023	-1.52995
C19orf50	0.087465	-2.4992	-1.5287
KRT4	0.92566	1.03702	-1.52835
MYEOV	0.347555	-0.96787	-1.52575
SSTR1	0.85331	-2.3202	-1.5249
PDS5A	0.323828	0.40067	-1.5241
FCF1	-0.150057	-0.738895	-1.5237
SELT	1.5952	-1.17619	-1.5229
LIN9	-0.333181	-2.30255	-1.52285
SLC12A2	0.324895	-0.73205	-1.51975
DICER1	0.40693	-0.22305	-1.5193
SSX5	-0.25529	-1.6239	-1.5191
FGF11	1.22476	-0.203535	-1.51797
C1QTNF2	-0.2055	-1.04493	-1.51755
IL31RA	-1.19942	0.8471	-1.5167
GPR107	-0.393665	-0.38016	-1.51585
SHANK1	-0.03061	-1.6159	-1.51485
PIN1	-0.74278	-0.750135	-1.51475
ZNF846	1.25915	-1.22792	-1.51405
CHTF18	0.192935	0.017695	-1.513
NCAM1	-1.0633	-0.532245	-1.51135
MYF6	0.176345	-0.442995	-1.50985
PIK3C2A	-0.160385	-0.8412	-1.50985
CACNB3	0.282265	0.507895	-1.50965
TSPAN10	1.40345	-0.583065	-1.50765
SCN9A	1.3406	-1.41309	-1.50645
SMAD6	0.11302	0.478975	-1.50505
TBC1D2B	0.609675	-0.623294	-1.50475
SRPR	1.00289	0.333018	-1.4999
SOX11	0.50928	-2.50215	-1.49985
TFB2M	-0.573445	-0.360235	-1.49715
OR51B6	0.166699	-0.5701	-1.49515
GRIK5	-0.48206	-1.4397	-1.49365
CACNA1H	0.04509	0.1417	-1.49255
NUS1	0.606787	0.09114	-1.4914
HOXA5	0.006185	-1.186	-1.49054
SLITRK2	1.49975	-2.00295	-1.4901
RPS25	-0.580002	0.237348	-1.4886
AHNAK	-0.587845	-2.7229	-1.4884
TMEM64	0.702815	-0.99934	-1.4876
CEP120	0.683255	-1.9138	-1.487
PEX11G	0.305044	-1.96725	-1.4852
ZNF155	0.37826	-1.17725	-1.48455
NOP58	-0.428715	0.96677	-1.4839
HSF2BP	-0.35186	0.491935	-1.48385
TAL2	0.676574	0.203625	-1.4824
KIAA1456	-0.241635	0.063945	-1.48195
MAFB	-1.29956	-0.46904	-1.47785
MFSD2A	-0.625385	-1.11291	-1.4769
DOCK5	0.4241	-1.16983	-1.47515
CYB5R3	-0.916275	-1.64495	-1.47435
RPL37A	-1.84895	-0.40538	-1.47306
TGFB1	1.00794	-0.44178	-1.47258
ZNF589	1.3436	-1.45399	-1.4706
ACOT11	-0.447845	0.620135	-1.46965
HMGN4	-0.524705	-1.5279	-1.46855
RASIP1	0.02417	-1.05236	-1.468
FAM50B	-0.149852	-1.05744	-1.46795
LINC00471	0.874095	-0.19118	-1.4679
KIF19	0.13039	-0.568925	-1.4666
OR6V1	1.2032	-1.502	-1.4663
MAPK8IP3	-0.692225	0.47137	-1.46475
TTC32	-0.205495	-0.781615	-1.46415
LAPTM4B	0.106845	-1.34415	-1.4633
MYL12B	-0.55096	-0.296835	-1.4607
KCTD6	0.314056	-2.22055	-1.46
RBM22	-0.73171	-3.3172	-1.4574
OR2A5	1.19903	-1.21118	-1.457
ATP6AP1	0.308564	0.286565	-1.45635
CCL2	-0.198905	-0.38344	-1.45635
MIER3	1.1904	1.6769	-1.45603
MS4A8B	-0.224485	-0.161304	-1.45555
SALL2	-0.487805	-1.12773	-1.4555
CACNG6	-0.105605	0.01394	-1.45505
NTN5	0.00044	-0.79436	-1.45335
C4orf26	-0.248705	-0.80237	-1.4533
FBLN2	-0.436003	0.763825	-1.4525
C16orf53	-0.38025	-0.870335	-1.45205
NXPH3	0.14639	-0.796754	-1.4519
IRGC	0.194203	-1.22614	-1.45145
PPP1R3F	-0.73538	1.21295	-1.45145
APOE	-1.77215	-1.5296	-1.4504
SP5	-0.802605	-0.878285	-1.4495
ZNF460	0.49743	-1.31805	-1.4493
PRRT3	0.380995	-1.6612	-1.44845
CHRM2	-1.31242	-2.1171	-1.4481
TPPP3	0.63349	-0.60091	-1.448
PRPH2	0.772105	-2.02865	-1.44775
VSNL1	1.04676	0.442725	-1.44565
IL23A	2.2093	0.248585	-1.44515
FCHO2	-0.04283	0.322275	-1.44505
CHST10	0.278112	-1.29365	-1.4447
PAEP	-0.132705	-1.0432	-1.4438
RAB11FIP2	-0.36618	0.479625	-1.44295
BDP1	-0.781085	0.73595	-1.4428
CACNG1	-0.48736	0.423238	-1.44225
ATP1A1	0.2216	1.40995	-1.44204
TRPV3	-0.456615	-0.621855	-1.441
MAGOH	0.614875	0.273845	-1.4406
ATP13A5	0.009095	-0.890185	-1.4394
TGFB3	0.909445	-2.0841	-1.4392
RBM28	0.984026	-1.08371	-1.43885
VKORC1	-0.47895	-0.75224	-1.43855
MRPL28	0.2895	-1.93045	-1.43759
MYT1L	0.560135	-0.172862	-1.43725
TIGD5	0.236204	0.17559	-1.43625
SLC2A9	-0.80252	-0.341384	-1.43615
C3orf35	1.4356	-0.298185	-1.4349
VAX1	1.15966	-1.32875	-1.43425
PIWIL2	-0.64537	-0.386025	-1.43325
FOXO1	1.5041	-0.024635	-1.43325
C8orf40	1.2042	-1.31505	-1.4332
PRMT10	1.43475	-0.981061	-1.43235
SYCP2	1.59375	-0.443229	-1.43225
CEP350	0.263986	0.178915	-1.43125
ERCC8	-0.669045	-1.08975	-1.43105
PRPF4B	0.283955	-1.68295	-1.42945
DPH2	-0.326855	-0.533145	-1.42875
PI4KA	-0.4883	-0.25869	-1.42845
KDM6B	0.009705	-1.3252	-1.4284
PILRB	0.829	0.480583	-1.4281
SLC25A33	-0.68235	-0.679425	-1.42755
CSRNP2	0.34055	-0.213555	-1.42725
ZNF565	0.760505	-1.38084	-1.42675
DUSP23	-0.485305	-0.304229	-1.4264
PRR14L	1.06733	-1.48205	-1.4264
C14orf43	-0.02216	0.314925	-1.42575
ELMOD2	0.84174	0.19601	-1.4249
ZNF720	0.653245	-0.62513	-1.42465
KLLN	0.445025	-3.33815	-1.4242
BRWD1	1.74705	0.05137	-1.4241
CDC42BPA	-0.8283	-2.29485	-1.42275
CLIP1	-0.030675	1.03321	-1.42214
PFKFB3	-0.0213325	-0.3364	-1.42205
RFC3	0.288353	-2.09635	-1.42095
KLHDC2	1.58713	-1.8636	-1.42045
ID3	0.296855	-0.51485	-1.4198
ST5	0.358928	-0.91751	-1.41925
EXOC2	0.196865	-1.4093	-1.4183
NDUFA1	1.26515	-0.68724	-1.4181
PAMR1	0.602035	-0.75108	-1.41795
LYRM1	-0.610405	-0.131275	-1.4179
ANKRD9	0.021815	0.0639221	-1.41625
AKR1A1	0.431364	-1.14612	-1.416
TKTL1	0.533985	0.367165	-1.41535
TBX2	-0.643694	-0.88836	-1.4153
ARL11	-0.328038	-0.755785	-1.41515
KDM2A	0.87065	0.204385	-1.415
TNP1	0.507576	-0.06765	-1.41445
ITK	0.737555	-1.4546	-1.41385
CC2D1B	0.86336	-1.8879	-1.41375
OR5H6	0.94946	-1.10325	-1.41315
NLRP12	0.828875	-0.69782	-1.41217
C20orf103	-0.794855	-0.38748	-1.4121
MYCT1	0.48186	0.007945	-1.41205
HIST1H4G	0.310485	-1.05421	-1.41175
ASPDH	-0.232145	0.085865	-1.41075
PZP	0.335835	-0.210315	-1.41045
NOP2	0.114687	-0.057867	-1.40875
ARAF	-1.12645	-0.67726	-1.40845
CD72	1.15124	-2.6223	-1.4077
CHRNA1	-0.801725	-0.72491	-1.40755
TMEM57	-0.367705	1.18141	-1.4072
C2orf67	1.5297	-0.326001	-1.4071
TBL3	0.059545	0.25325	-1.4069
MTERF	-0.0138	-0.733285	-1.40435
BIK	0.507415	-1.02729	-1.4043
CYB5D2	-0.775435	-1.35555	-1.4037
DSC2	0.52539	-1.8296	-1.403
CD69	0.830105	-0.178975	-1.4028
FOXR2	1.3366	-0.951777	-1.4027
MTHFSD	-0.155896	-0.299445	-1.40265
GGCX	0.602675	-1.00969	-1.40225
OR13H1	-1.5023	-0.67335	-1.40221
ACOT9	0.249737	-0.68838	-1.40145
CILP2	-1.6386	-1.48365	-1.40125
BAIAP2L2	0.6384	-1.36325	-1.40045
STRBP	0.84539	-0.15347	-1.40025
C17orf59	-0.881485	-0.93455	-1.3993
HS6ST3	1.3043	0.151625	-1.3991
PCDHGA7	-0.035145	-0.417385	-1.39795
ACRC	1.08869	-1.17173	-1.39786
ACVR1B	0.250565	0.433254	-1.39745
OXCT1	0.522294	-1.35938	-1.39675
LMO2	0.386695	0.096555	-1.3967
RBMX2	-0.409405	-0.493195	-1.39645
CELA2B	0.871345	-1.44355	-1.3959
KPTN	0.743364	0.12392	-1.3958
KIAA0232	0.102671	-0.87252	-1.39565
RHBDD2	0.135418	-1.54875	-1.39515
ZNF684	0.631345	-0.866909	-1.3946
COL18A1-AS1	0.973795	-1.2431	-1.3945
RPS18	-1.5048	0.604575	-1.39445
ELF3	-1.12303	0.480605	-1.39425
TYROBP	-0.35275	-0.96463	-1.39395
PCDH20	0.79254	-0.74659	-1.39375
FAM81B	-0.375215	-0.628745	-1.3926
MAP7	0.41693	0.08456	-1.392
R3HDML	0.176046	0.321985	-1.3911
HMHA1	-0.287245	-1.36976	-1.39075
NES	0.270935	-0.65171	-1.38995
ESRP2	-0.0693675	-1.2041	-1.3896
CCDC127	-0.041405	-0.123895	-1.3893
PSPC1	-0.248465	-1.3985	-1.38805
AVPR2	1.3149	-1.45215	-1.38775
OAZ3	-0.23231	0.109475	-1.38735
SLCO4A1	0.662595	0.739275	-1.38726
GFRA2	-0.469185	-1.47585	-1.3869
SETD8	1.25896	0.32547	-1.3863
ANGPTL1	1.10956	0.61546	-1.38615
NUP107	-1.12947	-1.6243	-1.3853
TSGA13	0.357205	-0.723243	-1.3851
MRPL23	-0.097357	0.85718	-1.3842
HMGB2	-0.959935	-0.231635	-1.3841
STH	-0.98832	0.907025	-1.3833
TNPO1	-1.78	-0.00539	-1.3831
MAP7D1	0.86794	-0.138482	-1.38285
SCAMP1	-0.57086	-1.761	-1.38235
TPSD1	0.631585	-0.35123	-1.38185
FEV	0.412715	-1.36785	-1.3815
ILF2	1.52203	-0.439785	-1.3806
PCCB	-0.602946	-0.43355	-1.3802
SDC3	-0.86642	-0.64289	-1.3799
C9orf79	-0.5118	-2.80415	-1.37975
ZNF783	-0.498044	-0.347602	-1.37955
C20orf201	-0.904625	-1.19685	-1.37935
LARS	-1.543	-1.63705	-1.3791
CCT7	0.597525	-1.09703	-1.37905
PHKG1	0.319355	0.220165	-1.37835
SYNGR1	-0.03759	0.41553	-1.37795
FAM117B	0.834365	-1.37875	-1.3774
PRR14	0.4997	-2.63715	-1.37735
TMEM31	-1.2922	0.518935	-1.3773
CHML	1.85283	-1.02147	-1.37725
OR52N4	1.0136	-0.657545	-1.3743
WDR75	-0.64881	0.079325	-1.3741
TAF4B	-0.031095	-0.676575	-1.37405
KIAA1324	-0.594855	0.617115	-1.374
ZP4	0.488495	0.062025	-1.3738
SLC43A3	0.19329	-0.556987	-1.37375
DGKA	-0.83289	-1.0669	-1.37355
ZNF69	-1.24011	-1.4282	-1.37315
INPP5B	1.15094	-1.26574	-1.37175
LRRN1	0.880885	-0.15635	-1.3715
MRPS23	-0.132998	-1.16383	-1.37092
SCN10A	1.8047	-0.60586	-1.37064
PDZD2	0.3776	-1.3382	-1.36985
ST8SIA1	0.164005	-0.76713	-1.3696
SDCBP	-0.99144	-2.1592	-1.369
SPTBN2	0.2084	-1.8843	-1.3682
DNAJB11	0.0681945	-2.794	-1.36785
TXLNA	-0.540057	-0.33096	-1.3675
KLRAP1	0.82057	-0.236573	-1.36635
TRIP6	-0.393845	-0.11642	-1.3658
IMP3	-1.13142	-2.17025	-1.36545
MRAP	-0.28183	-0.34677	-1.36485
CHCHD6	-0.216686	-0.146225	-1.36465
COASY	0.159245	-0.950585	-1.36445
MVK	0.416725	-0.580355	-1.36385
SATB1	0.378065	-1.2233	-1.36385
TMTC1	-0.0398	-2.1545	-1.36385
SEC61A1	0.73955	1.0693	-1.3635
EIF3G	-1.3156	-0.129585	-1.36315
TBCD	0.108871	-0.15759	-1.3631
SPTBN1	-0.96853	-1.8008	-1.3628
PRKACB	0.926585	0.249995	-1.3619
TBC1D9B	0.4309	-1.3951	-1.3619
MAML2	1.10505	-1.06857	-1.36176
NUSAP1	-1.13955	0.858745	-1.3615
OPRD1	0.446605	-1.05205	-1.36095
CCDC6	0.891635	-2.08055	-1.3595
GRPEL2	0.403605	-1.5414	-1.35915
HGC6.3	-0.580345	-1.06782	-1.35905
NUP98	-0.846835	-0.84781	-1.3589
VWC2	-1.88735	-0.448655	-1.35745
SNX20	1.87915	-1.2436	-1.3569
OR7E24	0.993225	-0.70986	-1.3568
SSPO	0.79388	-0.74509	-1.3563
C9orf72	0.57693	-1.05124	-1.356
DDX18	-0.709265	1.2076	-1.3559
PRRC2A	-0.4425	-0.72272	-1.3555
CCND1	-1.18075	-3.91915	-1.35485
LPIN3	0.32843	-1.5323	-1.35475
VASN	-0.601915	-0.883695	-1.35475
DHX33	-0.066875	-0.00294	-1.35445
ADAMTS1	-0.563397	-1.24707	-1.35395
PAPSS1	0.57438	0.047756	-1.35315
BICD2	0.439272	0.498212	-1.35255
ZSCAN20	0.22151	-1.51477	-1.35215
CALCOCO1	-0.82474	-0.087355	-1.3519
SPINK5	0.344763	-1.0253	-1.35142
TFE3	1.93735	0.133885	-1.3508
SASH3	0.07315	-0.444525	-1.35075
CNTNAP5	0.704535	-1.95	-1.35055
ADCK1	0.40322	0.253305	-1.34995
RBM47	-0.545122	-0.836045	-1.34944
LYN	0.45508	0.314326	-1.34935
VPS25	-0.289535	-1.43965	-1.3491
INF2	-1.3719	0.428545	-1.3489
LRRC16B	-1.16302	-0.017705	-1.3488
NTRK2	-0.904125	0.88284	-1.3488
PSMA1	-1.54387	0.0742	-1.3478
RAB11FIP4	0.196435	-1.06559	-1.3468
NYX	-1.4057	-0.250585	-1.3465
AASDHPPT	1.02148	-0.951765	-1.34625
HOXC11	1.3792	-0.164745	-1.34585
SRFBP1	0.345326	-1.5402	-1.3455
DPAGT1	-0.998025	-0.705875	-1.34465
CCDC116	-0.21155	-0.371669	-1.34424
C10orf67	0.525002	-1.13743	-1.3435
CCDC92	-0.54998	-0.32577	-1.3431
LPHN3	1.58985	-0.83726	-1.34255
ATP10B	-0.422235	0.45133	-1.3422
POLR3GL	-0.42131	-0.081707	-1.3421
AGR3	0.727485	-1.26745	-1.34195
ZSCAN23	0.467315	0.065928	-1.34195
PLEKHJ1	-0.92871	-0.434295	-1.34169
GKN1	0.69755	-1.6178	-1.3413
C3orf67	0.99499	-1.39055	-1.34045
TTI1	-0.0559345	-0.2677	-1.3402
RBP1	0.30293	-0.747715	-1.33993
MYOM1	0.15682	-1.00896	-1.33955
AKAP1	1.4384	-1.05282	-1.3394
FAM177B	0.165475	-1.37585	-1.33935
TAF5L	1.09234	0.37817	-1.33855
ITPK1	-0.807265	-2.23005	-1.3384
CADM1	1.24187	-1.4406	-1.3378
C16orf59	0.067625	-0.284097	-1.3376
KRTAP6-2	0.131936	-0.631505	-1.33735
WDR18	-0.36033	0.13611	-1.33585
SMEK2	1.2344	-1.10976	-1.33561
NLK	1.25672	-0.231272	-1.3356
SDHAF1	1.9967	-0.06821	-1.3353
VIPR1	-0.145592	-1.35066	-1.33485
EGR3	1.26262	0.448632	-1.3336
CLUAP1	0.77103	-1.73845	-1.3333
ATP5G2	1.08816	1.00845	-1.33275
GPC4	0.087007	-0.489805	-1.33205
RFX1	-0.6173	0.024855	-1.33205
ANKRD5	1.22123	0.08019	-1.33195
ZC3H4	-0.50143	-1.65225	-1.33185
TRPV4	-1.08568	0.33072	-1.32975
MGEA5	-1.06697	-0.666935	-1.32881
BECN1	-0.73948	-1.18647	-1.3288
SPZ1	-0.478575	-1.78995	-1.32865
C18orf1	-0.156055	-0.8123	-1.32855
NSL1	-0.53014	0.445565	-1.3284
PTGER4	0.6301	-1.7032	-1.32805
DNAJB13	-0.508485	1.39895	-1.3276
CCBE1	-0.69469	0.438275	-1.327
C17orf80	-1.8162	0.136202	-1.32695
GABRQ	-0.9239	-1.00799	-1.3268
ZNF319	0.087155	-0.941	-1.3263
MAPKAPK3	0.528265	-1.32415	-1.3261
PLEKHF1	0.74168	-0.26085	-1.3257
KLK4	0.986205	-1.44413	-1.3255
RAB42	-0.202275	0.052781	-1.3255
TM4SF4	0.3532	-0.0234845	-1.32505
TPH2	0.6136	-1.30959	-1.3239
CDKN1B	0.505077	-1.37945	-1.32385
PXN	-1.10198	-1.14565	-1.3233
PLA2G2F	0.08564	-0.204035	-1.32213
GH2	-0.720515	-0.12752	-1.3221
TGFB1I1	0.968525	-1.3318	-1.32195
ZNF81	1.64275	-1.75785	-1.32085
SGMS1	0.06472	0.589835	-1.31992
EEPD1	-0.794195	-0.116241	-1.3196
GLI2	-0.106373	0.665735	-1.31947
MMP12	0.433081	-2.25265	-1.31945
HSD17B1	-0.61684	0.06241	-1.31895
ZNF304	-0.004625	0.00625	-1.3187
BTF3	-0.9182	1.15339	-1.31865
CTDSPL	0.790185	-1.5157	-1.3185
C11orf1	0.70069	-1.58258	-1.31815
OR5D13	-0.161975	0.15588	-1.31812
CTXN3	-0.50909	0.11713	-1.31725
ZC4H2	0.261115	0.178468	-1.3169
TAX1BP1	0.73376	-0.64316	-1.3156
SMS	0.518872	0.0599045	-1.31555
ADCY8	1.26604	-0.06171	-1.3155
PRMT5	-0.17138	1.18545	-1.31495
HP1BP3	1.85828	0.37657	-1.31475
NELF	-0.515795	0.05204	-1.31417
C12orf11	0.705091	-1.48245	-1.31379
NUDCD3	0.34804	0.233365	-1.31351
FAM83E	0.37367	-1.2603	-1.3135
SAMD10	-0.68488	-0.98789	-1.31316
PDXK	0.766055	0.565585	-1.31315
POLR1E	-0.886655	-0.341556	-1.31305
OR13C9	1.1489	-1.59925	-1.3124
RLF	0.113069	-1.11405	-1.31195
WDR44	1.35905	-0.92516	-1.31175
CD81	0.299975	-0.651	-1.3116
NAE1	-0.335185	0.159075	-1.3109
HYAL3	0.847895	-0.0275	-1.3108
TARBP2	0.0245	-1.3668	-1.31025
CBLN3	0.39151	0.737965	-1.30995
C11orf35	-1.05302	0.27673	-1.3099
NFATC3	1.8344	-1.25192	-1.30983
SERPINF1	0.85319	-0.229756	-1.3093
NHLRC3	0.286425	0.05265	-1.30805
FBXO7	1.7405	-0.65259	-1.3074
ZBTB45	0.0237984	0.37171	-1.30715
LRP2	-0.9481	-0.48153	-1.307
RBFOX2	-1.1516	-0.62586	-1.307
MAPK11	0.5816	-0.030855	-1.3065
QARS	0.22395	-1.40168	-1.30635
C6orf25	0.77216	-2.103	-1.306
CNOT3	0.111605	-0.712409	-1.30585
DHDDS	0.362496	-1.9021	-1.30575
NME4	-0.07149	-0.48372	-1.30575
CLN3	-0.32962	-1.45966	-1.30565
DHX29	-1.31125	0.597576	-1.30535
CSF1	0.29799	-2.014	-1.3052
SLC6A4	0.147835	-1.5414	-1.30495
TP53INP1	-0.61541	0.485775	-1.30476
FAM98B	0.36385	-0.746455	-1.3046
KIFC3	-0.767995	-0.600523	-1.3039
WDR36	1.27025	-0.36024	-1.3039
CYP4V2	-0.012745	-0.81803	-1.30385
RBM26	1.19095	0.294906	-1.3034
PCDHGB6	0.70519	-2.5051	-1.3031
ARHGAP25	1.13236	-0.92786	-1.30305
CPXM1	1.04767	-1.05427	-1.30305
LMNA	0.34685	-0.821895	-1.303
COL25A1	-0.149772	-0.54997	-1.30295
HK3	0.6357	-0.141806	-1.30275
IL12RB1	0.266625	-0.844705	-1.30255
MID2	1.04651	-0.724903	-1.30195
ONECUT2	-0.0668564	0.478305	-1.3017
DFNA5	0.40294	-1.42185	-1.30105
PADI2	-0.505645	-1.67065	-1.3006
SNTA1	1.21	1.18221	-1.3006
INPP5J	-0.670125	1.02165	-1.30045
PARP2	0.307171	0.341851	-1.3004
DYSFIP1	-0.0500715	-0.115365	-1.29902
HIPK1	-0.39891	-0.729435	-1.29805
CDK1	-0.361005	-0.28925	-1.2975
OR52E6	0.91361	-0.709025	-1.2975
RPL38	-1.67425	1.1734	-1.29721
ZNF333	0.624295	-0.684365	-1.2964
LRRC8D	-0.40834	-1.9812	-1.29575
ARHGEF19	0.51689	-0.70016	-1.2957
MIXL1	0.26535	-0.434905	-1.2955
LLGL2	0.3012	-2.36985	-1.29545
CCKAR	0.81181	-0.146235	-1.2953
CRIM1	0.03177	-0.88164	-1.2951
TROAP	0.344275	-0.64229	-1.29415
LRR1	0.69502	-0.908425	-1.29265
SHROOM1	0.41991	-0.87665	-1.29194
MUC1	-0.08292	-2.6328	-1.29165
SS18	0.0920725	0.21773	-1.291
ARPC5	0.69985	-0.685285	-1.29095
SLC43A1	0.009085	-1.633	-1.2903
EVPL	1.237	-0.23952	-1.29019
IL13	-0.267465	0.225857	-1.29015
DMBT1	1.09672	-1.51475	-1.28975
INSIG1	-0.85723	1.42715	-1.28915
FAM171A1	0.559371	-1.8169	-1.28865
KCNAB3	0.516565	-1.45635	-1.2884
ZNF34	0.47247	0.60782	-1.28795
HHIP	0.276216	-1.2031	-1.2879
EML2	0.3742	-1.53524	-1.28785
DNAJC3	0.50068	-0.767115	-1.28785
COG6	-0.135249	-1.67443	-1.2875
C15orf37	-0.60714	-2.43725	-1.2868
MAPK9	0.200519	0.58031	-1.28635
REC8	1.20835	0.115635	-1.28545
C15orf41	0.045565	0.445639	-1.2854
FBXW11	0.34455	-1.39265	-1.28505
PLA2G4D	-0.133144	0.50062	-1.2849
FAM109B	1.13169	-0.12772	-1.28475
RDH16	-1.574	-0.13862	-1.28243
NKAIN3	-0.187726	-0.358665	-1.2813
RAC2	0.912179	-0.81681	-1.2811
ITFG1	0.04847	-0.151505	-1.281
ZDHHC24	-0.983075	0.587983	-1.2806
COL8A1	0.78942	-0.20113	-1.27995
OAT	-0.65375	0.844285	-1.27905
DOPEY2	0.751605	-0.9055	-1.27895
NUP133	-1.12955	-0.950215	-1.27876
RXFP1	0.34374	-0.515848	-1.2783
MAML3	-1.0145	-1.55295	-1.27795
C5orf30	0.463605	0.16815	-1.27785
RBBP8	-1.0562	-0.975125	-1.27764
ATXN10	0.82945	-1.4786	-1.27605
IFT27	0.901405	-1.56595	-1.27595
GPR158	1.11404	-0.2154	-1.27535
MRPS12	0.487075	0.265025	-1.27355
HMGB3	0.799315	-0.45334	-1.273
TGM1	1.243	-1.11373	-1.2722
CDYL	-0.180355	-1.05275	-1.27185
CYP4F8	0.57712	-1.57935	-1.27171
WDR35	-0.306365	-2.0828	-1.27165
FTSJ2	-0.27926	0.557315	-1.2716
ISCU	-0.965425	-0.11298	-1.2715
EMR2	0.379675	-1.36896	-1.27135
OR6C68	1.8303	-0.57794	-1.2713
PROSC	-0.257105	-3.35905	-1.27045
COL6A2	0.189303	-1.10459	-1.27035
DCAF12L2	0.378618	-1.28235	-1.2702
TNP2	0.012965	-1.61385	-1.2701
PROCA1	2.1484	-1.4897	-1.26995
NMNAT1	-0.10597	-1.13478	-1.26968
WIPI1	0.35578	-1.13506	-1.26963
MITD1	0.112756	-1.5608	-1.26925
ADC	1.00333	-0.740725	-1.26915
IGFL4	0.90808	-1.63165	-1.2691
TRPT1	-0.0063	0.336895	-1.26905
PM20D1	0.124307	0.123656	-1.26813
FGF3	-0.24536	-0.437478	-1.26795
PPCDC	-0.293725	-0.80135	-1.26792
LBH	0.398644	-1.3782	-1.2678
ORC4	1.45955	0.202365	-1.26765
GPR34	-1.12487	-1.85965	-1.2672
LTBP4	-0.251915	-0.99487	-1.2672
NFAM1	-0.82048	0.875205	-1.26694
TOM1L2	1.18035	-0.8872	-1.2669
MCM4	0.103005	-2.0272	-1.2666
ELAVL2	0.552675	-1.3457	-1.26562
KLRG2	-0.40022	0.42871	-1.26547
ANKS3	-0.73264	-0.44043	-1.26545
ATF1	-0.405095	-2.35645	-1.26517
FLRT1	0.345495	0.032445	-1.26515
FAM125B	-0.98306	-1.41945	-1.26465
AACS	0.75652	-0.80564	-1.26315
HIPK4	-0.462337	-0.494155	-1.263
GALM	0.47426	-1.12282	-1.26235
RALGDS	0.55429	-0.151631	-1.26174
O3FAR1	0.86183	-1.47445	-1.2614
GATAD2A	-0.3229	-0.809733	-1.26113
ATG4A	-1.07002	-0.378041	-1.26098
HTR6	0.141855	0.206365	-1.26085
COL4A3	1.30646	-0.817935	-1.2607
CCM2	-1.2229	-0.41898	-1.26045
RASGEF1C	-0.458595	-1.7519	-1.2599
ZBED3	0.07143	-0.740932	-1.2599
AVPR1A	0.215017	0.52736	-1.25925
PPP1R11	-0.47725	-1.72265	-1.2591
WDR4	1.6172	1.6143	-1.2582
C15orf54	1.52815	-1.54855	-1.25805
MEAF6	0.116715	-0.6957	-1.258
PCDHB6	0.70115	-0.30228	-1.25745
DOC2B	0.486765	-1.37971	-1.25625
XPO7	0.593175	0.00711	-1.2562
ADAM10	0.89635	-0.4347	-1.25605
IL11RA	-0.36436	-1.894	-1.25595
SEL1L3	-0.45412	-2.277	-1.25595
SLC9A5	0.6954	-1.89625	-1.25588
EIF3I	-1.1709	-1.26409	-1.25466
ASB8	0.816555	-0.953545	-1.25405
TTLL12	0.97515	-1.27904	-1.25381
MINK1	0.14421	0.224025	-1.2535
UBL7	0.6146	-1.64295	-1.2535
CNN2	0.445405	-2.05705	-1.25325
EIF3H	-0.22746	-0.296195	-1.25315
UBE2H	1.1958	-0.3182	-1.2528
C6orf203	0.31728	-1.51013	-1.25267
PANK1	0.565155	-1.26754	-1.25235
MRPS17	-0.82493	-0.0938	-1.25215
ERGIC3	-0.26464	-0.03744	-1.2521
CDK12	-0.14624	0.269585	-1.25205
SIGIRR	0.726055	-1.11175	-1.2512
NOSIP	-0.210575	-0.34622	-1.251
PIAS2	0.75195	-0.088869	-1.25095
C7orf33	0.945065	-0.350917	-1.25081
KDELC2	-0.8251	-0.469225	-1.2505
SPIB	-0.322605	-0.518317	-1.25015
C10orf2	-0.419935	-1.37326	-1.24925
DHX32	1.2652	-1.0808	-1.24915
DAO	0.92098	-0.886905	-1.24913
TMOD2	0.64363	-0.07246	-1.2491
PKDCC	-1.24459	-0.458115	-1.2489
ARRDC3	0.591715	-0.402765	-1.24845
ISL2	-1.07537	0.1298	-1.24811
COPS7B	0.72304	0.026975	-1.24765
TEKT1	0.747135	-1.34926	-1.24755
FNDC3A	1.63355	-0.79706	-1.2472
CES4A	1.2489	-0.292405	-1.24715
GPR77	-0.4019	-0.41904	-1.2466
GPR160	-0.592765	-1.24965	-1.24575
LAMA1	-0.295055	-1.16655	-1.24565
NAA15	-0.842875	-0.571045	-1.2456
CBLN1	0.398355	-1.91345	-1.24555
NFIL3	1.5129	-0.530765	-1.24555
PCDHB12	1.05425	-1.26172	-1.24554
HGF	-1.39135	-1.8664	-1.24535
TELO2	-0.2591	0.614665	-1.24465
CRISP1	1.21849	-0.572195	-1.24445
PHTF2	1.08581	-0.39535	-1.2428
DPYSL2	-0.424245	0.221955	-1.24135
CHCHD7	0.094445	-0.220782	-1.2412
CIAO1	0.78122	-0.521075	-1.2407
FRAS1	0.343426	-0.472505	-1.24053
WFDC13	0.68232	-0.5517	-1.2401
LYSMD2	1.25711	-1.04117	-1.2399
PPID	1.00745	0.43568	-1.23975
FBXL16	-1.01092	-1.22595	-1.23955
C6orf221	-0.0015	-0.569745	-1.2394
NAAA	-0.0476405	-1.8302	-1.2393
SMG8	-0.13795	1.01774	-1.2389
CHST13	-0.04696	-0.868555	-1.23885
BCL7B	-0.359211	-0.067765	-1.2383
RPL36	-1.8032	1.07955	-1.237
KRTAP27-1	-0.0670505	-0.943335	-1.23675
BLM	-0.083385	-0.95207	-1.23585
NFIX	-0.821655	0.10608	-1.23585
ROCK1	-0.05128	-1.2497	-1.2355
IGSF10	0.86886	-0.30997	-1.23545
CDC16	-0.04081	-1.00762	-1.23515
TLR6	1.43085	0.291805	-1.23505
CCDC36	0.12396	-1.02511	-1.23438
LTV1	0.59821	-0.251424	-1.23405
MKLN1	0.441855	-1.0506	-1.2335
RPL32	0.22285	-1.31367	-1.23325
ZIM3	0.77573	-1.5169	-1.23315
SDR16C5	-0.174428	0.820735	-1.2328
TCF7L1	-1.12006	0.164949	-1.23245
IL34	-0.443545	1.20065	-1.23234
RNMT	-1.45315	0.601125	-1.2322
UBA52	-1.83245	1.06712	-1.2318
PYDC2	0.03391	-0.893125	-1.23145
FBXO4	1.82965	-0.628845	-1.23135
RNF32	-0.084825	0.40451	-1.23095
PURA	1.9337	-0.658505	-1.23055
ACTRT2	0.923735	-0.481795	-1.23042
SRCAP	0.209445	0.30942	-1.23038
NTF4	-0.70389	-1.29015	-1.23035
VAX2	0.45941	-1.16793	-1.2303
GREB1	0.077655	-0.778986	-1.23015
TCTA	0.128725	-0.48356	-1.22994
SCARA5	0.11889	-1.73695	-1.22905
NXT1	-1.05324	-0.076005	-1.22869
MID1IP1	-0.10052	-2.02905	-1.22855
C9orf7	0.0214	-0.37091	-1.22829
PSMB4	-1.89455	1.14574	-1.22825
DEFB113	0.079433	0.08296	-1.22809
NINJ1	-1.8746	0.55056	-1.2278
GOLGB1	0.47273	0.28897	-1.22771
FFAR1	0.6545	-0.572675	-1.22755
RPA2	-0.12166	-0.913055	-1.22726
POMGNT1	0.210841	-0.7874	-1.22695
PHLPP2	0.900355	-0.823599	-1.22636
FEZF2	0.358438	-0.57046	-1.22615
CASC4	0.5881	0.0751655	-1.22555
ERG	0.462945	-0.52664	-1.22555
OSGIN1	0.47131	-0.48147	-1.22525
RRP1B	0.472299	-1.41312	-1.22466
NOL12	-0.910465	-0.51439	-1.2242
BAK1	0.241255	-0.005665	-1.2241
PDE6G	1.3795	-0.15595	-1.22347
RHPN1	0.728895	0.22382	-1.22345
HDGFL1	-0.23624	-0.80908	-1.2232
GFM2	0.914215	-1.11746	-1.22311
SUPT3H	0.108656	-0.83391	-1.22285
CST9L	0.616252	-1.26723	-1.2227
BAIAP3	-1.15165	0.505272	-1.22245
TACSTD2	0.69873	-0.440839	-1.2223
COMMD7	1.07078	0.613275	-1.22215
EVX2	-0.2717	-1.23375	-1.2221
PRPSAP2	0.59516	-1.34667	-1.2221
C5orf64	0.254895	-1.4172	-1.22195
LYPD3	0.75599	-1.14635	-1.2219
BAIAP2	1.25216	-1.12298	-1.2213
CSTF2	-0.65241	-0.15001	-1.22115
LRP3	-1.09909	-1.08563	-1.2208
ATP11C	0.549005	0.402204	-1.2205
PRIC285	0.24396	0.171669	-1.2205
BBS12	0.231485	-1.1486	-1.2201
TLE1	-0.41995	0.052379	-1.2201
IL17RB	0.3984	-1.91118	-1.21995
SMARCB1	-0.947485	-0.740845	-1.2199
OR2AK2	0.540225	-1.2046	-1.2196
SHD	-0.43191	-1.34824	-1.21935
PHTF1	1.5367	0.05568	-1.2192
MORF4L2	-0.21429	-1.05944	-1.2192
USMG5	0.32469	-0.71994	-1.21915
FAM164C	1.07828	-0.229341	-1.21871
CD207	-0.0224	-1.10438	-1.2184
PAN2	0.438635	-1.08817	-1.21775
CDK2AP1	-0.97331	-1.40665	-1.2177
EN1	-1.5985	-3.1482	-1.21755
FAU	-1.17235	0.57779	-1.2175
DDX54	-0.0474745	0.474484	-1.21735
GLIS1	0.011185	-1.78869	-1.2164
PLEKHA3	0.78088	-1.5893	-1.2163
SLC10A1	0.60229	0.812655	-1.2161
SLC8A2	-0.98295	-1.07041	-1.21583
ERBB4	0.007605	-0.205595	-1.2148
ARHGEF16	-0.27498	-0.335387	-1.2142
NRBP1	0.28928	-0.681	-1.21414
GNRHR	1.1459	-0.515014	-1.21295
GLUD1	1.3033	-1.81785	-1.21255
AMPD3	0.804085	0.38266	-1.21235
LHX8	0.924775	-2.017	-1.21141
MFHAS1	0.71356	-1.01354	-1.21075
CNR1	0.98402	-0.037436	-1.21065
SPTLC2	-0.789145	-1.40593	-1.21015
KRTAP10-8	-1.1101	0.131935	-1.21005
RING1	0.77377	-0.99419	-1.21005
MYCBP2	0.775005	-1.7092	-1.21
RNASEH2C	0.6519	-2.01255	-1.20945
RNF167	0.34844	-1.49786	-1.20945
ABHD15	-0.52819	0.418605	-1.20938
KIDINS220	1.07669	-0.656915	-1.20935
NUBP2	0.58104	-0.879408	-1.209
TBXAS1	0.44389	-0.582882	-1.2089
DDRGK1	0.7065	-1.02732	-1.20844
OR7A17	0.64103	0.693744	-1.2078
RIBC1	-0.50639	-0.841225	-1.20765
FBXO34	1.05143	-0.655645	-1.20748
MTDH	1.5358	-1.58995	-1.20715
SCRG1	1.53145	-0.463685	-1.207
U2AF1	-0.785965	-0.202	-1.20691
OR4C3	0.19955	-0.687865	-1.20645
PTBP2	-0.54025	-1.3076	-1.20585
ADORA3	-0.065935	-1.6218	-1.2058
AHDC1	-0.118419	-0.876985	-1.2058
ANXA5	-0.19277	-1.62165	-1.2056
GPC5	-1.4326	-0.086315	-1.20525
PGM2L1	0.96772	-0.78435	-1.205
IQCF2	-0.513045	-1.08364	-1.2044
GOT1	0.299075	-1.15124	-1.2041
PIGW	0.024267	-0.63269	-1.2041
RBPJL	0.683097	0.077965	-1.20402
LRRK1	0.95519	-0.144165	-1.20378
CCT2	-0.082856	-1.88015	-1.2035
GPR1	0.898655	-1.14714	-1.2033
CABLES2	0.555095	-0.015955	-1.203
GP1BA	-0.468215	0.667034	-1.20295
TSN	-0.439155	-1.8998	-1.20295
INTS3	-0.265168	-0.133305	-1.2027
MSI1	0.07065	-2.0882	-1.20134
DGAT1	1.08887	1.2038	-1.20129
NUBPL	0.440075	0.417825	-1.20046
SLC19A1	-0.0105087	-0.85943	-1.2004
GPR148	-0.292555	-0.889735	-1.20035
FAM40B	-1.7028	-1.71975	-1.2001
C13orf26	-0.158144	-0.0584065	-1.19949
HCCS	-0.324051	-0.809165	-1.19931
PHB2	-0.039215	0.183155	-1.19915
SLC26A7	0.927065	-2.12445	-1.19818
PLEK2	0.542925	-1.66785	-1.1978
SORCS1	-1.70075	-1.76495	-1.1975
FAM78B	0.67994	-0.242693	-1.19645
MED29	-1.3777	0.49564	-1.19574
MCHR1	-0.697125	-1.4605	-1.19535
AP3M2	0.226909	-0.31416	-1.1951
POT1	-0.27915	-0.14096	-1.19475
KIF26B	-0.0763705	-0.369455	-1.19467
ZXDC	-1.12705	-1.75535	-1.19405
ZNF687	-0.617615	-2.1203	-1.19376
C12orf45	-1.0906	-0.03101	-1.19352
PMP22	0.142065	-1.3999	-1.19331
LEPRE1	-0.676455	-2.4686	-1.1922
CCNY	-0.13502	1.67975	-1.19209
GRB2	-1.3911	-0.862715	-1.19205
PRDM12	0.14946	-0.97237	-1.19157
CCDC25	-1.05666	-2.5896	-1.19125
PIGO	-0.810625	-0.406925	-1.191
SRRT	0.509415	-0.4099	-1.19065
KIAA1161	0.0775	0.857475	-1.19046
GALC	1.19119	-0.333365	-1.18961
LRRC67	0.01137	-0.5622	-1.1894
CACNG7	-0.122769	-1.15724	-1.18927
MEF2D	0.387061	-0.84187	-1.18885
LUM	0.160876	-1.0904	-1.18865
KIAA1539	0.651415	-0.903705	-1.18845
PVRL3	-1.21485	-1.60045	-1.18835
TFAP2C	0.59324	-0.767035	-1.18835
NRSN2	0.58451	-0.0398755	-1.18813
PDLIM7	-0.129151	-2.0009	-1.18774
PLD3	0.43687	-1.25906	-1.18731
NCKAP1L	1.6309	-0.26308	-1.1869
TMEM91	-0.80691	-1.03317	-1.1869
YIPF3	-0.273585	-0.915565	-1.18685
CPN1	-0.044465	-0.57851	-1.1868
PLAA	-0.984335	-0.10488	-1.18647
ICAM4	-0.239455	-1.38449	-1.18632
IL27RA	-0.013497	0.393292	-1.18596
VIPR2	0.559995	-1.3477	-1.18565
OR1L3	0.678865	-0.758086	-1.18556
KCNJ3	0.46781	-0.715585	-1.18538
C12orf53	0.57245	-0.894205	-1.18521
ARHGAP9	0.17267	-1.55332	-1.1852
CD40	0.51119	0.227534	-1.1852
OR2D3	0.722645	-0.783555	-1.185
TBC1D20	-0.291745	-0.51365	-1.18495
ADAM20	0.006905	-0.106105	-1.1846
NCAPH	-0.088295	-0.63083	-1.18455
EDN1	0.813785	-0.11732	-1.18406
SLC38A3	0.359362	-0.674542	-1.1839
TEX13B	-0.387073	-0.12677	-1.18385
ERMP1	0.914425	-0.597085	-1.18375
NSMCE4A	-1.518	-2.23915	-1.18348
CDH11	1.0458	-1.24705	-1.18281
HNRNPU	-1.01999	0.216955	-1.1826
NACA2	0.25398	-0.39212	-1.18245
IKBKE	-0.62043	1.38365	-1.1823
TBL1XR1	1.03628	-0.807335	-1.1823
AIPL1	1.31895	-0.114425	-1.1821
GLDC	0.61927	-0.689271	-1.1818
C1orf182	0.31124	-1.07809	-1.18165
CTDSP1	0.940525	-0.24876	-1.18165
NEO1	1.09827	-0.77421	-1.18151
TAF9B	-0.476255	-1.8937	-1.18125
XKR6	-1.25955	-0.644425	-1.18119
OFD1	0.42369	-0.291244	-1.18055
C16orf72	1.07477	-0.469285	-1.1801
NDUFA4L2	-0.274825	-1.03683	-1.1795
ADH5	-0.951415	-0.953905	-1.17933
CCDC135	-1.41875	0.552725	-1.17925
CXorf65	0.82824	-2.1662	-1.17868
SCAMP4	-0.631565	-1.9793	-1.17865
SLC35A3	0.0832481	0.65937	-1.17865
RPS27L	1.25421	0.33557	-1.17855
PPFIA4	-0.12275	-0.084555	-1.17842
USPL1	-0.951965	-0.413546	-1.178
ADRA2B	0.916655	-0.352435	-1.17779
ZNF696	1.05735	0.83117	-1.17679
C1QTNF1	0.32978	-0.504186	-1.1758
KIAA1328	-0.33476	-1.5547	-1.17467
HSF5	0.58542	-0.68826	-1.1745
ZIM2	0.157742	-1.261	-1.1744
OTUD4	0.826145	-1.2524	-1.17385
SRXN1	0.34557	-0.60384	-1.17368
MARK4	-1.4182	0.277394	-1.1733
SNX2	0.32432	-0.064657	-1.17295
EBPL	-0.166835	0.929245	-1.1727
TM2D2	0.22209	-1.9763	-1.17251
ACOX1	0.904715	-0.736675	-1.1725
CCDC149	-1.2186	-0.55329	-1.1724
NIF3L1	0.0603655	-0.040415	-1.17225
IL22RA2	-0.241695	-0.38685	-1.17221
C9orf16	-0.05856	0.020805	-1.17215
MT3	0.851055	0.5625	-1.17179
THRB	0.87849	0.017396	-1.1716
CDX2	1.2709	-1.9545	-1.17155
SPTBN4	-0.40194	0.329891	-1.17149
CST9	0.74111	0.42473	-1.1713
CCL22	0.537587	-1.1877	-1.1709
SLC6A11	0.492695	-0.6829	-1.1709
ZRANB2	-0.37642	0.186025	-1.17055
DLX5	0.410768	-0.520165	-1.17038
NDUFS1	0.391115	-1.74575	-1.16975
FUT6	0.383575	-0.353985	-1.1697
RAB5B	-0.289009	-1.17567	-1.16905
GNB2	-0.744525	-0.787465	-1.16885
LPAR3	0.72851	-0.575925	-1.16875
PLEK	0.271625	-1.2112	-1.16865
HNRPDL	-0.687505	-0.69722	-1.16838
FAM165B	0.28958	-1.6858	-1.1679
BTBD6	0.3699	-1.4479	-1.16785
GDPD3	-0.261032	0.72452	-1.1678
CRHR2	0.611285	-0.615855	-1.16755
CLEC4A	-1.3884	-0.32712	-1.16755
WDR52	0.430635	0.03898	-1.1672
COG8	-0.615885	-1.8225	-1.1671
ZNF554	0.061765	-1.37935	-1.1671
UAP1L1	0.76097	-0.437745	-1.16695
FIP1L1	0.70018	-0.76357	-1.16681
LZTS1	-1.21402	-0.524795	-1.16657
GPR63	0.86224	-0.84639	-1.16622
PLA2G12B	0.5002	-0.93876	-1.16555
ZCRB1	0.877235	-0.951745	-1.16525
RPL7	-1.8847	-0.629525	-1.16521
OR5M11	1.369	0.089205	-1.16505
ATF2	-0.79653	0.253492	-1.16375
GRHL1	1.29095	-0.60609	-1.16304
TMEM79	0.45868	-0.744035	-1.16221
EXOSC10	2.15935	-0.90531	-1.1618
TBC1D22B	1.35385	-1.5829	-1.1618
CXorf64	-0.2136	-1.51051	-1.1615
CNGA3	0.57018	-0.31466	-1.1613
LDLRAD1	-0.22785	-0.76218	-1.16125
NEU2	-0.3897	-0.96235	-1.1612
CSNK1A1	0.237775	0.04049	-1.1608
NPFFR1	-0.32617	0.3421	-1.1602
ARFIP1	1.26058	-2.20625	-1.16005
ARHGEF17	0.0312075	0.49674	-1.16002
SERPINB7	0.348388	-0.698345	-1.15949
ECM1	0.442195	-0.099235	-1.15943
CDC42EP5	0.4556	-0.09638	-1.1593
SMARCAD1	0.161605	-2.09945	-1.15926
DES	0.136645	-0.88094	-1.15888
DTNB	0.122501	-1.10767	-1.1588
XYLB	2.23325	-0.813665	-1.1587
RABGGTA	0.217565	-0.528845	-1.15803
KLHL24	0.901195	-1.51775	-1.15795
TMLHE	-0.17355	-0.35166	-1.1576
C21orf91	0.39965	0.25542	-1.1575
DEFB128	0.85266	-1.58269	-1.1575
GLB1L	-0.0794	0.0469	-1.15742
SAMD1	-1.23311	-0.110055	-1.15725
GNG7	0.53462	0.10505	-1.1569
SCAND3	-0.405584	-0.752677	-1.1568
DHRS11	0.49195	-0.774275	-1.1559
TRIM41	0.038255	-0.53501	-1.1559
ZFP2	-0.184926	-0.73992	-1.15583
TMEM85	0.6764	-0.99946	-1.15579
DPP6	0.567995	-0.528325	-1.15575
S1PR2	-0.552995	-0.549355	-1.1557
ATXN7L3B	0.980605	-1.4049	-1.1552
PIK3C3	0.544275	-0.366845	-1.1552
HRK	-0.255208	0.12454	-1.15505
NOS1	1.12459	0.26608	-1.1546
BAALC	0.086335	0.497015	-1.15453
C16orf87	0.38961	-0.479	-1.1543
MAFG	-0.27877	-1.6403	-1.15332
OR5C1	0.36639	0.32355	-1.15315
SOX6	0.138773	-0.48744	-1.15268
THY1	0.07489	-0.011015	-1.1525
MMGT1	-1.24339	-0.319285	-1.15235
BAG1	0.308115	-0.774815	-1.15199
DNMT1	-0.54816	-1.2991	-1.15195
HEATR2	0.0829	0.0903	-1.15125
OR6C1	0.430279	-0.26696	-1.15101
TFF3	-1.3857	-0.291055	-1.15099
BORA	-0.551185	-1.818	-1.15046
SUCNR1	0.360585	-1.26935	-1.15045
ENTPD5	-1.15524	1.36231	-1.15043
ZNF582	0.951615	-0.678115	-1.1501
IFIT3	-0.64733	-0.635175	-1.15007
FBXL21	0.523185	-0.79622	-1.14985
LRTM1	-0.447981	-0.50376	-1.14984
FAM124A	0.51308	-0.826255	-1.14905
COL9A2	-0.235748	-0.16486	-1.14837
ABL2	0.96232	-0.52833	-1.14836
KLHL30	-1.1141	0.06297	-1.1482
ABHD5	-0.02131	-0.241035	-1.14814
FAM24A	-0.445575	-2.4413	-1.14808
TMEM105	-1.44155	-2.5546	-1.14783
ZNF432	0.792835	-0.67003	-1.14741
LUZP2	0.82545	0.105055	-1.1469
PGGT1B	-0.126037	-1.36515	-1.1469
CMTM3	0.18133	-2.4889	-1.14687
MGAT1	1.02052	-1.36153	-1.14685
ZNF134	-0.508508	-0.83965	-1.1466
DPYSL3	-1.71975	-1.37435	-1.14655
DEGS2	0.667092	-1.64735	-1.1465
EIF5B	-0.100219	0.565365	-1.14631
CD83	0.584629	-1.22158	-1.1461
DEDD2	-0.227935	-1.9325	-1.14579
C10orf91	-0.80806	-0.50332	-1.14572
RTDR1	-1.691	-0.735705	-1.14558
OTOGL	0.992255	-1.4448	-1.145
PRMT3	1.02645	-0.457205	-1.145
RAB7A	-0.94263	-1.3979	-1.14492
RPS7	-1.98815	0.352166	-1.14475
KIF5A	0.410963	-2.347	-1.14474
ROS1	1.05076	-1.45215	-1.14451
C1orf212	1.19463	-0.33407	-1.14421
CMTM7	1.06725	-1.28197	-1.14417
PHC1	-0.098134	1.5191	-1.1438
TMEM62	0.073002	-0.088375	-1.14332
ATP2B3	0.505565	0.20157	-1.14319
CTTNBP2	0.7801	-1.02743	-1.14308
EFCAB4A	-1.17803	-1.00283	-1.14292
ZNF556	-1.07359	0.108115	-1.14244
FSIP1	-0.306777	-0.463405	-1.1417
POLR2H	-1.41425	-1.04012	-1.14119
ACTC1	0.130815	-0.84556	-1.14108
GATSL3	-0.109815	-0.915015	-1.14076
LPCAT1	-0.0116	-0.262288	-1.1404
RAD17	-0.97402	-0.370515	-1.14029
RAB44	-0.36531	-1.35092	-1.13941
DAPK1	1.13257	-0.394695	-1.13914
KREMEN2	-0.52469	-0.552155	-1.139
RANBP2	0.71457	-0.97985	-1.13891
GATA6	0.22487	-0.349435	-1.1384
PLAC8L1	1.18684	-0.84361	-1.1384
OLA1	-1.1906	-0.492457	-1.1378
FBXL14	-0.661855	-0.65741	-1.13751
LEPROT	-0.13494	-1.20914	-1.13715
FOXRED1	-0.060481	-1.80305	-1.13709
CA5A	0.385007	-0.35748	-1.13705
TESC	-0.155169	-0.565125	-1.13689
SERPINH1	-0.34308	-2.2089	-1.13685
ACTR6	0.38243	-0.12506	-1.13635
ZNF467	0.19002	-0.82288	-1.1362
MMEL1	0.252435	-0.852195	-1.13593
ZNF683	0.120605	-1.34495	-1.13585
ZNF18	1.59485	-0.320768	-1.13568
POLR3E	-0.088	-0.463801	-1.13559
TIMM8B	0.28701	-0.96741	-1.13515
SLC41A2	0.050905	-0.789575	-1.1349
TACC2	0.417965	-0.654465	-1.13482
PNPT1	0.23089	-0.27255	-1.13475
ESF1	-1.5484	-0.5382	-1.1346
ATP1B3	-0.27236	-0.576133	-1.13456
GPI	-0.296315	0.500725	-1.13456
ZNF414	-0.731585	-0.222835	-1.13402
FOXN1	0.32535	-0.543825	-1.13383
SIVA1	-0.16822	0.12697	-1.13365
MAGEL2	-0.468405	-0.243465	-1.133
RPS19BP1	-0.350065	-0.57794	-1.1324
SLC1A5	0.243216	0.19305	-1.13234
H2AFY	-0.564773	-0.375945	-1.13228
HYLS1	-0.136965	-0.35636	-1.13227
SMAD5	-0.0495135	0.12081	-1.13215
ULK2	0.205985	-0.515425	-1.132
C10orf71	-0.440535	-0.167735	-1.13175
CSDA	0.340705	-0.381545	-1.13165
PIGN	0.024236	0.07038	-1.13125
WFDC12	1.29033	0.301915	-1.13095
MLYCD	0.077235	-0.241628	-1.13065
PARP10	1.20345	-1.06068	-1.13047
SLC12A4	-0.457035	-1.528	-1.12967
CD1E	-0.145755	0.108205	-1.1296
RYR2	1.33838	0.22498	-1.1295
ZNF75A	1.00001	-0.9586	-1.12943
FGA	0.97994	-0.98581	-1.12871
WDR34	0.365395	-0.272245	-1.12864
LPHN2	-0.465115	-0.857205	-1.1284
TINAG	1.16338	-0.02845	-1.12825
TJP1	0.170909	-1.09971	-1.12825
RPRML	-1.4945	-2.38345	-1.12824
P2RY4	1.07212	-0.451505	-1.12815
GLTPD2	-0.61507	0.677315	-1.12796
P2RX1	0.180885	-1.88175	-1.12746
PCSK1N	-0.477705	-0.169855	-1.12725
HK2	-1.49135	-1.5548	-1.12685
KLHL34	1.2097	-0.88367	-1.12665
LPAR2	0.424875	-1.66125	-1.12625
HPCA	-0.63006	0.523995	-1.12584
ZNF618	-1.1628	-1.33231	-1.12572
TM6SF1	-0.459128	-0.588955	-1.12535
CAPN2	0.56505	-1.48005	-1.1253
DUSP21	0.75111	-0.713087	-1.12515
PTH1R	-0.05402	0.123873	-1.12509
INTS10	0.93624	-0.70963	-1.1231
LSM12	0.049518	0.093565	-1.12275
ARHGAP30	0.323475	-0.781945	-1.12271
CAMKK1	0.163694	-1.22175	-1.12268
AXIN1	-0.172995	-0.51017	-1.12264
DYM	0.05497	-0.88591	-1.12261
TANC1	-0.0317	-1.25911	-1.12259
FAM196B	-0.454415	0.743285	-1.12254
PILRA	1.5592	-1.5643	-1.12228
DRD2	-0.71394	-0.75423	-1.122
USP38	0.38953	-0.41944	-1.12189
TMED8	0.107559	-1.77375	-1.1217
SELV	0.4475	-0.956395	-1.12145
CHST9	-0.05164	0.12561	-1.12135
STAT3	1.20237	1.12608	-1.12102
MICAL1	1.0853	-1.16406	-1.121
OGDHL	-0.494525	-0.747885	-1.121
MOBKL2A	0.701355	-0.938145	-1.12075
PEX11A	1.70475	-1.8074	-1.12044
RBP7	0.2852	0.309136	-1.12037
MEX3C	0.242323	-0.511723	-1.11995
RAD9A	1.99325	-2.23115	-1.11991
TP53I3	-1.53125	0.303741	-1.11946
GPR114	-0.066386	-0.902545	-1.11855
TTC14	-0.650035	-0.8019	-1.11845
NOTUM	-0.487285	0.039255	-1.1184
GRPR	-0.326715	0.38102	-1.1184
COX7B2	-0.33749	-0.68881	-1.11824
MC2R	-0.369185	-1.25155	-1.1176
FLNA	0.67545	-0.72	-1.11743
GABARAP	-0.69798	0.239375	-1.11738
HES6	-1.00305	0.77049	-1.11679
CDHR2	1.34014	0.72801	-1.11645
ATF5	-0.518905	0.946325	-1.11605
OR11A1	0.775755	-0.71131	-1.11601
SLC10A2	0.792145	-1.39376	-1.11593
IFI35	-0.17993	-1.1134	-1.1159
IFI27	-0.53414	-0.88812	-1.11499
EIF2B5	-0.71028	-0.99644	-1.11496
LYPD5	0.62845	-0.763625	-1.11453
ZNF599	0.22708	-0.77367	-1.1144
POC1A	1.08233	0.60079	-1.11427
RNF41	0.536905	-0.51004	-1.11407
MCM7	1.02021	-0.43703	-1.11319
TNRC6B	-0.91655	1.7739	-1.11291
KRT32	0.34164	0.529185	-1.11163
DLK1	-0.107575	-0.763615	-1.11146
C7orf60	0.771075	0.246055	-1.11123
GABRA6	0.044425	-1.23649	-1.11118
PYGL	0.752525	-1.10695	-1.11103
EPO	0.82716	-0.930275	-1.11084
FN1	0.85483	-1.37095	-1.11069
KIAA2013	-0.95186	-0.67196	-1.11059
SERPINB1	-1.22389	-0.358785	-1.11032
KRTAP13-1	-0.58585	-0.52762	-1.11
RCOR1	0.087165	-0.178165	-1.10994
MPP5	0.435658	0.136225	-1.10985
ST14	0.099965	-2.8416	-1.10982
SEH1L	-0.0036545	-0.575545	-1.10935
BMP5	-0.296375	-2.3812	-1.1093
EFHC2	2.2045	-0.631865	-1.10926
SLC24A3	-0.8376	-0.1107	-1.10902
RRP9	-0.307612	-0.068939	-1.10901
GRAMD1B	0.493365	-1.25011	-1.10895
TRIB1	-0.532035	0.482715	-1.1089
IL8	-0.454854	-0.50553	-1.10886
ITPKB	0.032395	-1.0971	-1.10878
S1PR4	-0.96601	-0.258435	-1.10757
COX7A2L	0.323465	-0.804025	-1.10703
KRTAP6-3	0.59191	0.029176	-1.10643
DRG2	1.25222	-1.45635	-1.10635
B3GAT1	0.981545	-0.039405	-1.10613
NDUFS6	0.009815	0.776055	-1.106
ELOVL5	1.3708	-0.59662	-1.1059
MEA1	-0.008985	-0.286225	-1.10563
RAB8B	-0.336544	1.10854	-1.1055
SNCA	-1.27005	0.805505	-1.10535
TMX3	0.649815	-1.09323	-1.10505
GATA1	-0.76435	-0.105025	-1.10501
IFFO2	0.40774	-0.460495	-1.10454
TMEM97	-0.446766	0.00913	-1.10437
CEP72	0.901345	-0.83682	-1.1042
PCSK7	-0.24703	0.11013	-1.10302
ICAM5	-0.438184	-0.50571	-1.10285
ACER2	1.04668	-1.5804	-1.1028
CEP68	-0.297285	-0.6115	-1.10265
ZFP106	0.02195	0.425685	-1.10255
BBS4	0.66105	-1.77855	-1.10247
ARHGAP44	0.0428315	-0.343915	-1.10235
OR10H2	0.37344	-0.29839	-1.1021
DEFB135	0.485941	-0.802935	-1.1018
TAF8	0.48524	-0.533173	-1.1017
FYN	-0.600135	-0.618275	-1.10169
SPIN3	1.00423	-2.1832	-1.1016
FLCN	0.582726	1.30295	-1.10123
MANEA	0.554395	0.393205	-1.10117
COMT	-0.084285	-0.563369	-1.10116
METTL1	-0.025385	0.65656	-1.10115
TSPAN3	1.53635	-0.53864	-1.10095
SRPX2	1.13196	-1.7787	-1.1009
LAMB3	-0.593645	0.488495	-1.10082
C8orf74	0.679645	-0.142245	-1.10081
ERBB2	1.03408	2.5335	-1.1008
TRHR	1.6742	-0.27649	-1.10062
TMEM190	-0.534205	0.640085	-1.10045
INSR	-0.275705	-0.95103	-1.10024
PDPK1	-1.03412	-0.242345	-1.1002
RBM5	-0.322955	-0.66174	-1.10014
PFDN4	-0.28372	-1.9098	-1.0996
SLITRK5	0.44579	-0.71989	-1.09927
SERPINE1	1.10323	-0.909745	-1.09906
INSL6	-0.0772065	-1.00877	-1.09844
UBE2K	-0.564625	1.01852	-1.09837
C6orf191	0.563788	0.515035	-1.09732
DDX41	-1.819	0.77985	-1.09716
CASQ1	0.69676	-0.972915	-1.09675
PRM2	0.32635	-1.1888	-1.09655
KLHL9	0.028425	-2.135	-1.09625
MARS	0.661155	-0.779945	-1.09516
GNAQ	1.30185	0.1072	-1.09506
ZNF358	-0.181455	0.615143	-1.09483
ADAM11	-0.69309	-0.943915	-1.0945
TULP4	0.32346	-0.30532	-1.09425
B3GNT3	0.22378	-0.780192	-1.09424
ODF2L	0.23612	-0.966985	-1.09396
C20orf151	-0.694375	0.271675	-1.09371
DMC1	0.361005	-0.907015	-1.09322
PDLIM5	0.680409	0.2944	-1.09204
NFE2	-0.731645	-1.44225	-1.09177
ZNF575	-0.063775	0.04362	-1.09153
OR4D1	0.749315	-1.31565	-1.0915
C2orf16	-0.22716	-1.4202	-1.09114
LTF	-0.90291	-0.234385	-1.09093
OR1A2	0.189395	-0.185782	-1.0909
THNSL1	0.572965	-0.0377455	-1.09048
ZBTB41	0.372655	-0.267645	-1.0899
OR51E1	1.526	-1.23815	-1.08948
OR52B2	-0.18643	1.2188	-1.08946
ELMO2	1.76505	-1.0601	-1.0894
C11orf49	1.07072	-0.442235	-1.08925
SLC11A2	-0.660305	0.45135	-1.08862
STIL	-1.2124	-1.63735	-1.08861
TFAP2D	-0.74214	-0.15882	-1.08842
VTI1A	0.90182	-0.668685	-1.0882
DNAJA1	0.454034	0.262525	-1.08797
OR2B6	0.09619	-0.005395	-1.08788
TTC12	0.3402	-0.33249	-1.08785
CABLES1	0.313195	-1.50296	-1.08777
S100A14	-0.66425	-1.12652	-1.08725
INADL	0.80374	-1.86125	-1.08638
DDX1	0.087445	1.05502	-1.08628
FUNDC1	0.7651	-0.86159	-1.08594
CNOT6L	-0.173177	0.13699	-1.08587
RECK	0.31987	-0.09534	-1.08545
FBXL2	0.19789	-0.381512	-1.08535
LRFN3	-1.67285	-1.0673	-1.08529
PHLDB2	-0.186885	-0.89136	-1.085
OR7A10	0.328365	-0.62513	-1.08495
TUB	0.165253	-0.695445	-1.08474
MUL1	1.39265	-0.236335	-1.08466
ATP1A2	0.34687	-0.84052	-1.08454
SPATA12	0.330755	-1.2895	-1.08412
GLI3	0.726357	0.432198	-1.0841
ZFP42	0.49291	-0.65382	-1.084
KLC3	0.218565	0.27419	-1.08386
URM1	-0.092551	0.04097	-1.08377
ANKRD44	0.37161	-0.607835	-1.08365
WISP1	1.44035	-0.022335	-1.08357
SKP1	-0.463005	0.56215	-1.0831
ST8SIA6	-1.68545	-0.48514	-1.08264
C9orf156	0.069994	-1.26972	-1.08263
BEND6	0.47112	-1.01728	-1.08262
PAX7	-1.27855	-0.864375	-1.08242
ZSCAN1	-0.291945	-0.268735	-1.08195
SLITRK4	-0.86171	0.5685	-1.0817
FBXO2	-0.26639	-0.868289	-1.08164
MRPL33	0.28903	-0.447905	-1.08163
RRAD	-0.46951	-0.018475	-1.0816
TRPM1	0.179445	-1.43825	-1.0813
TMEM200A	0.934945	-0.8269	-1.08087
C20orf3	0.975565	-1.14925	-1.08082
DUSP11	1.00313	-0.86682	-1.08058
NFASC	0.12836	-1.9269	-1.08055
CCDC91	0.59411	-0.711585	-1.08033
HINT2	-0.69519	-0.998605	-1.08018
ARPC1A	-1.19525	1.56295	-1.07991
PHLDA3	0.128435	0.17405	-1.07989
FGF21	-0.371065	-0.039925	-1.0792
LHFPL1	0.604635	-0.578	-1.0791
SEMA7A	0.847575	-0.743845	-1.07829
KLF8	-0.655209	0.21402	-1.07825
GMEB2	-0.01351	-0.67826	-1.07809
GPR135	-0.151992	-0.667855	-1.07795
NPBWR1	-0.143691	-0.9911	-1.0778
KLHDC5	1.07706	-0.869945	-1.0778
NAB2	-0.065925	-0.38658	-1.07775
ESR2	-1.00722	0.729285	-1.07758
DPP4	0.00334	-1.6373	-1.0775
IL6ST	1.69725	-1.4332	-1.07745
CALCRL	0.641605	-0.20798	-1.07724
RABGAP1L	1.1747	0.7027	-1.0772
JAK1	-0.113875	-1.31478	-1.07715
SPSB4	-0.76796	-0.326385	-1.0766
FOXQ1	-0.299415	-1.34895	-1.07611
SKAP1	-0.36809	-1.7279	-1.07611
TTC23L	0.20974	-1.32715	-1.07611
CTSB	0.70189	-0.52842	-1.076
OTOP2	-0.157196	0.6192	-1.07586
SNX25	0.324087	-0.843005	-1.07532
DPPA4	0.99064	0.01403	-1.0748
C1orf131	0.60758	-0.474765	-1.07458
TSEN34	-0.237765	-1.3886	-1.07452
C19orf42	1.12805	-0.81869	-1.07442
MRPS31	1.15457	-1.52006	-1.07441
PAGE1	0.193695	-0.203185	-1.0744
MPV17L2	-0.01751	-0.885264	-1.07431
RPS6KB1	-0.359896	-1.40515	-1.0742
CELF2	1.13409	-0.715855	-1.07417
PLRG1	-0.825155	-0.04096	-1.0741
GAR1	-0.08115	0.95632	-1.07403
PRKAA1	-0.673785	-0.42783	-1.07371
SYT8	2.26165	-1.26725	-1.07366
SLC4A3	1.2228	-0.124665	-1.07336
LRGUK	0.27474	-3.4059	-1.0733
GRK1	0.43757	-2.3319	-1.07315
TEK	0.353171	-0.646475	-1.0729
C3orf21	-1.65525	0.85624	-1.0724
OLFM2	0.364755	-0.810775	-1.07239
PPPDE2	0.58494	-0.75127	-1.07201
ARFIP2	0.398443	0.416535	-1.07166
NDUFS4	1.571	-0.30503	-1.0716
YIPF4	-0.041787	-1.3797	-1.0715
PDZK1IP1	0.400475	-1.6995	-1.07143
CLEC11A	0.13586	-0.16537	-1.07125
LRRC7	0.54385	-0.84585	-1.07065
VN1R5	0.487845	0.357398	-1.07052
ITGA3	1.3909	-0.38473	-1.0705
TTLL5	0.97602	-0.943465	-1.07017
STK36	-0.651205	-0.066345	-1.07005
SEC22C	-0.74675	0.154343	-1.07003
CRB1	1.59909	-0.03377	-1.0698
C6orf162	0.08045	0.568275	-1.06968
LIN7A	-0.007275	-1.18666	-1.06944
SCRN1	-0.444575	0.23252	-1.06905
FAM154A	-0.13762	-0.000395	-1.06881
DCTN1	-1.22615	-0.522385	-1.06863
SPATA4	1.5814	-0.98403	-1.06845
NUP153	-0.484505	-0.90787	-1.06844
TAP1	0.62784	-1.6821	-1.06818
ADAM7	0.413555	-0.83636	-1.06805
DGAT2	-1.48595	0.15684	-1.0679
OR5K4	-0.946365	-0.775405	-1.0678
USF2	-1.98065	0.129675	-1.06768
MAP1A	0.57559	0.0812645	-1.06754
C6orf97	0.71897	-1.5398	-1.067
TLR1	1.02022	-0.0661	-1.06695
PINK1	0.284667	-1.07825	-1.06688
ADRBK2	0.084089	-0.931375	-1.0666
AURKA	-1.9583	0.263928	-1.06615
TNRC18	0.979905	0.016705	-1.0657
ANKDD1A	-0.42567	-1.68525	-1.0655
NCBP2	0.30349	-0.627775	-1.0655
SERPINI1	0.999395	-0.88596	-1.06515
TAF1A	-1.78005	0.114376	-1.06512
TMEM63A	0.061265	-1.702	-1.06479
BUB1	-1.924	-2.34095	-1.06466
MYLK4	0.8964	-1.04211	-1.06445
KDELC1	-0.321685	-1.41378	-1.0643
PPP4R1	1.36249	-0.644945	-1.06387
COL23A1	0.61792	-0.133606	-1.06355
PLA2G15	-0.897505	0.718199	-1.0634
BOC	-0.222375	-2.089	-1.06315
PCDH1	0.326915	0.36644	-1.06296
S100G	1.16952	-0.175415	-1.06288
ACTN4	0.213961	0.122042	-1.06187
ZC3H10	-0.32246	-0.208645	-1.0618
NFE2L1	-0.32338	-1.33245	-1.0615
LAD1	-0.0961575	-0.15402	-1.06105
ABCA3	-0.098845	0.412525	-1.06088
PCDH8	0.37683	-0.647995	-1.06074
KRBA1	-1.20338	-0.789675	-1.06044
LCN8	0.30262	-1.24922	-1.0601
SLC39A5	-0.42705	-0.184326	-1.06005
CCDC88B	-0.700885	-0.299524	-1.06003
FAM43B	1.555	-0.63719	-1.05989
RNF10	0.749175	-1.0383	-1.05912
CALCR	1.01008	-1.49433	-1.05903
TMEM98	-0.992345	-0.14648	-1.059
C14orf178	-0.669695	0.314592	-1.0588
PSTK	-0.159898	-0.97018	-1.0586
ALAD	1.00067	-1.99655	-1.0582
ELAVL4	-1.5741	-1.6294	-1.0579
FUT9	-1.30883	0.26783	-1.05781
TOMM20L	0.68831	-0.904527	-1.0571
CYP2W1	-1.96605	-1.66085	-1.057
MFSD11	-0.171765	-0.0312	-1.05699
PKNOX2	-1.21399	-0.141097	-1.05635
FBXO45	0.35047	0.12355	-1.05624
MED6	-0.98032	0.249996	-1.05612
FMO2	0.829335	-0.700415	-1.05598
PLS1	-1.3564	0.188355	-1.0559
DUS3L	-0.4045	-0.32571	-1.05577
TMEM155	0.20298	-0.439025	-1.05574
TRAK1	0.04325	-0.222865	-1.05558
MNT	0.609785	0.386175	-1.05555
LINC00176	0.585865	-0.275265	-1.05551
TRMT61A	-0.438899	-0.99866	-1.05519
PPP6R1	-0.291485	-0.260328	-1.05495
SETD2	-0.90807	0.144364	-1.05483
MRGPRG	-0.357336	-1.0913	-1.05465
RASSF5	1.06188	-0.547395	-1.05465
VAV1	0.84309	-0.92625	-1.05464
ARHGAP27	-0.50896	-0.443175	-1.05408
NHLH1	-0.02127	-0.36046	-1.05377
LIN28B	-0.18366	-0.744805	-1.0537
LRRCC1	0.176525	-1.07106	-1.0532
SLC6A17	0.456325	0.784624	-1.05307
CH25H	0.393135	-0.731915	-1.05268
PTGIR	0.144642	-0.75312	-1.05258
UBXN6	-0.598245	-1.67035	-1.05258
HPS3	0.503025	-0.22774	-1.0525
KIAA1530	0.125721	0.434437	-1.05245
C10orf11	0.0953775	0.0869465	-1.05225
SLC2A11	0.540714	-1.11295	-1.052
EED	-0.61602	0.716555	-1.05192
DGKI	0.167166	0.184515	-1.0518
GSX2	-0.64789	1.68775	-1.05126
C3orf78	-0.0609655	-0.558625	-1.05108
ZNF419	0.31765	1.0781	-1.051
EXD1	0.547306	-1.64005	-1.05079
EVX1	0.795005	-0.902435	-1.05075
TLE2	0.18075	-1.3419	-1.0507
CEACAM18	-0.469975	-0.97357	-1.05002
RAD23B	-0.377655	0.0260265	-1.04972
TAS1R1	0.943915	-1.92295	-1.04946
MRPL48	0.512205	0.3007	-1.0492
CEP70	-0.08184	-2.0651	-1.04894
BUB1B	0.180719	-0.725575	-1.04875
PCDHGB1	-1.10618	0.73555	-1.0487
SBNO2	0.513165	-1.03113	-1.04851
FGF10	-1.18518	-0.46638	-1.0485
DLGAP3	-0.161124	-1.11387	-1.04821
ZADH2	0.19506	0.442925	-1.04805
COLEC10	0.61526	0.62034	-1.04787
C19orf70	-0.231076	0.51566	-1.04785
ALG3	0.279015	0.51104	-1.04757
KCNK10	-0.0096637	-0.22659	-1.04723
C1GALT1	0.86448	0.0899612	-1.04698
NUP205	-0.405995	0.059005	-1.04685
GPR119	-0.0912465	0.908415	-1.04655
GSTM5	0.10231	-0.06697	-1.04635
C1QA	-0.203673	-2.0417	-1.04622
PATE3	0.82972	-0.954595	-1.04619
GLMN	-0.91527	-0.57616	-1.04615
OR14A16	0.830735	-0.871955	-1.04614
CLINT1	0.788515	-0.55824	-1.0458
ST6GALNAC4	0.52407	-0.536265	-1.04553
NOG	-0.99473	-1.72615	-1.04537
OVCH2	0.884425	-1.17165	-1.04461
OSTBETA	-0.0231215	-0.215505	-1.04433
WBSCR27	-0.307255	-1.88445	-1.04383
HOXC5	-0.57257	-1.16786	-1.04354
RORC	-1.54195	-1.40285	-1.04348
PPP4R4	1.3876	1.4078	-1.04348
NPBWR2	0.07293	-1.6029	-1.04347
BPGM	-0.71675	-1.7172	-1.04335
KRTAP5-1	-0.72813	-0.567255	-1.04321
STAP2	-0.347615	-0.904595	-1.04314
DAZL	0.494925	-1.12855	-1.04295
IQCA1	-0.329	-0.95439	-1.04289
DPP3	-0.379994	0.14818	-1.04288
BCOR	0.207915	-1.33135	-1.04282
LRCH4	-0.21018	-0.512565	-1.04275
CST6	0.72798	-0.985365	-1.04267
WDR46	-0.639615	1.66135	-1.04263
NETO2	0.0547	-1.08245	-1.04261
NUMB	1.07882	0.41622	-1.04252
LIMK2	0.166905	-0.30329	-1.04248
GIPC3	0.03867	0.84732	-1.04197
PARP16	1.1758	0.160765	-1.04172
TSSK6	1.2364	-0.410465	-1.0417
TTC26	0.75952	0.200795	-1.04153
VARS2	0.2909	0.3726	-1.04093
DNAL4	-0.016865	0.148377	-1.04038
GMPPA	-0.249068	0.15172	-1.04026
CNBP	-0.80256	0.288955	-1.04025
C20orf54	0.18761	-0.51453	-1.03989
OR51D1	0.23837	0.45916	-1.03987
SRI	-0.488405	0.320267	-1.03984
VEGFC	0.224885	-1.32503	-1.0398
HESX1	0.3238	-0.434615	-1.03943
KRT5	-0.22305	-1.32844	-1.03931
KIAA0020	-1.24871	-0.65438	-1.0391
PODN	0.68128	-0.27937	-1.03904
MYH8	-0.796655	-1.9963	-1.039
PATE2	1.2339	-0.69133	-1.03802
RNH1	0.19107	-0.34923	-1.03773
RBM14	0.03542	-0.94018	-1.03755
DHX36	-0.358895	-1.3769	-1.03748
ATF6	0.183705	-0.02291	-1.03693
GMPS	0.195804	-1.47725	-1.0369
SELK	0.978015	-0.528595	-1.03663
EIF1AX	-1.66935	0.254815	-1.03614
AKAP4	0.379972	-0.303475	-1.03578
GPN2	-0.82838	-2.5217	-1.03575
FARSA	0.724335	-0.241752	-1.0354
HIST1H2AC	-0.198367	-0.895715	-1.03531
NUDC	0.358518	-1.09353	-1.03524
ARL4D	-1.9875	-0.267098	-1.03509
EIF3L	0.0139773	-0.842145	-1.03499
THBS1	0.28486	0.23679	-1.03469
DOC2A	-1.02523	-0.40898	-1.03439
PCNP	-0.489515	-1.71895	-1.03398
LEMD3	-0.0429305	0.509912	-1.03384
MBTPS2	-0.155557	-1.94545	-1.03379
NKG7	0.165325	-0.66402	-1.03358
CTDNEP1	0.147505	-1.36485	-1.03354
TNN	0.458275	0.228792	-1.03344
TBC1D1	0.945055	-1.53475	-1.03339
TRIP4	0.76761	-0.29548	-1.03325
CAD	-0.652315	0.52401	-1.03275
GPIHBP1	-1.68475	-0.79978	-1.03231
BDH1	-1.30095	-0.52354	-1.03219
C9orf40	0.838675	-1.2945	-1.03197
KIF25	0.541675	-1.96165	-1.03178
CDH12	0.496195	-1.58015	-1.03153
EML4	0.475357	0.018125	-1.0313
DOK2	0.764195	0.25108	-1.03066
NGB	-0.201755	-1.02377	-1.03065
MRGPRE	-0.820025	-1.7618	-1.03028
WNT9B	-1.01239	-0.35504	-1.03005
DLL1	0.0369	-0.436785	-1.02986
KLRAQ1	1.90835	-0.47103	-1.02962
SEC14L4	0.015687	-1.7789	-1.02931
TRPC5	0.574935	-0.49925	-1.02926
PKLR	1.10689	-0.171045	-1.0292
HCFC1	-0.16704	-0.273105	-1.02893
MTF2	-1.38265	-1.7162	-1.02885
PAAF1	0.601345	-1.20927	-1.02876
ADSS	0.424135	-0.395345	-1.02874
RS1	-1.29425	-0.414512	-1.02867
CNN1	-0.744005	-1.3403	-1.02853
TMEFF2	0.1642	-0.489475	-1.02851
IL17RA	0.808405	-0.616925	-1.02842
MYBL1	0.042635	-0.59047	-1.02839
NAA38	-1.18778	0.6318	-1.02825
TTC23	-0.457475	-1.4992	-1.02763
PRDM2	-0.857055	-0.64821	-1.02725
RTN4R	0.139377	-2.5132	-1.0268
GNAS	0.552505	-1.09742	-1.02655
ADIPOR2	0.6275	-0.02918	-1.02651
NTSR1	-0.449135	-0.33358	-1.02643
HRH2	-1.76595	-2.78295	-1.02642
SNRPG	-0.63876	0.01545	-1.02591
EPHA2	0.22683	-0.651765	-1.02582
ROR2	0.934675	-1.06196	-1.02564
TERF2IP	0.4386	-0.62069	-1.02555
OR52D1	0.533165	-0.9056	-1.02468
PROKR1	-0.253585	0.10431	-1.02448
NANOS1	0.829136	-1.84465	-1.02435
CRYAB	-1.4297	-1.17602	-1.02397
THAP8	0.54991	-0.561495	-1.02395
TNKS	0.91748	-1.09428	-1.02372
CCDC65	0.699345	-0.32698	-1.02346
SARDH	-0.95017	0.986095	-1.02319
KRTAP5-11	0.40625	1.4457	-1.02304
TYR	0.92083	-0.9832	-1.02272
CCNG1	0.673115	0.12959	-1.02233
SH3GLB1	0.28447	-0.96438	-1.02208
RCN3	0.817675	-0.08045	-1.02191
EFHD2	-0.057535	1.07129	-1.02185
S100A3	0.734565	-0.7251	-1.02154
CTSZ	1.623	-0.410565	-1.0215
GDF9	1.1356	-0.48602	-1.02077
CHIC2	-0.42875	0.313252	-1.02075
SLC25A28	0.258777	-0.339225	-1.02075
TUFM	-0.052706	-0.49846	-1.02066
AKIRIN1	-1.6585	-0.46047	-1.02046
CISH	-0.874	-0.55942	-1.0204
INSIG2	0.433303	-0.396665	-1.01984
VAV2	-0.025355	1.10922	-1.01984
MYH7B	-0.309405	0.031855	-1.01968
GRIP2	-0.47138	-1.76365	-1.01906
DDX24	-0.456305	0.93305	-1.01904
LRRC23	0.18998	-0.4138	-1.01877
C16orf62	-0.511085	-0.07642	-1.01853
MS4A6E	-0.599365	0.043405	-1.0185
BCL9L	-1.8034	-0.55416	-1.01809
PTX3	0.090199	-0.52019	-1.01804
CITED2	-1.00066	-0.767985	-1.01789
FCRL6	0.669115	-0.435225	-1.01777
ANKRD45	0.284226	-0.0617475	-1.01757
NLN	-1.10972	-0.37439	-1.01706
MLLT11	-0.825015	-1.35105	-1.01686
NCF4	0.257641	-0.71618	-1.01642
PHF2	1.01123	-1.98045	-1.01623
DPM3	-1.66785	0.576225	-1.01572
C20orf134	-1.07489	0.393965	-1.01561
ERMN	0.970785	-0.698817	-1.01445
KIAA0141	-0.988995	-0.548903	-1.01433
FAM105B	1.06237	-0.717365	-1.01418
RC3H1	0.625415	-1.52435	-1.01408
SLC7A1	-0.4674	-0.46343	-1.01406
FPR3	0.487745	-0.020935	-1.01404
CDK17	0.572426	-0.928015	-1.01401
MMRN1	0.36303	1.09976	-1.01397
ZNF470	0.66016	-0.58822	-1.01395
LSM4	-1.32909	-0.08792	-1.01381
TATDN2	0.29532	0.504045	-1.0137
BDKRB1	0.845305	-0.048975	-1.01339
DCST1	0.21479	0.041753	-1.0132
SH3BP1	0.082465	-0.826915	-1.01309
FGR	0.56935	0.247595	-1.013
PCDHB3	-0.053157	-1.4836	-1.01273
EHD4	0.723075	-1.3684	-1.01272
FPR2	0.154929	-0.106975	-1.01253
KRT10	0.057315	-0.92994	-1.01253
GAS2L2	-0.637835	-3.43665	-1.01234
MANBAL	0.453145	-0.008745	-1.01217
PEAR1	-0.58383	-1.14196	-1.01181
PRSS21	0.269815	-0.87795	-1.01172
NF2	0.71534	-1.22055	-1.01135
KLHL3	1.33035	-0.467525	-1.0113
THOP1	-0.0897445	0.74625	-1.0112
CLEC4F	0.65869	-0.90224	-1.01117
CDHR5	2.01025	0.139675	-1.01073
EPCAM	-0.02413	0.02809	-1.01032
NEURL2	-0.391015	-1.08712	-1.01023
PLEKHG2	1.04809	-0.09453	-1.01023
NUDT9	-0.08944	-0.887785	-1.00984
RPF2	1.25583	0.217255	-1.0098
CD276	-0.363105	-0.619505	-1.00975
KCNH8	-0.65007	-0.351731	-1.00974
PIP4K2C	0.91405	-0.73433	-1.00967
PNPLA7	1.3784	0.0043645	-1.00949
PDCD10	0.431685	-1.33925	-1.00855
AARS	0.226853	-0.009985	-1.0084
C6orf105	0.4799	-0.149985	-1.00835
GSG2	0.341135	-0.817025	-1.00828
NCLN	1.34065	0.53816	-1.00816
TOPORS	0.70583	-0.500455	-1.00811
SPEF1	0.452565	0.610845	-1.00806
BIRC5	-0.740975	-0.76508	-1.00753
BACE1	0.241186	-1.9493	-1.00709
HOXD10	-0.64372	-0.187595	-1.00693
JUB	0.997985	-0.230305	-1.00684
RPTOR	0.921855	0.065465	-1.00657
STAT5B	0.731356	-1.76485	-1.00631
ZNF391	-0.0640905	-1.06583	-1.00625
OR5W2	0.70492	-0.0084611	-1.00604
CSNK2A2	0.487141	-0.780415	-1.00598
ASB17	1.05585	-0.391805	-1.00584
DPEP1	-0.253425	-0.55493	-1.00584
PPFIA2	-1.08906	-1.2637	-1.00554
RBP2	0.278435	-1.583	-1.00553
UGP2	1.59865	0.0644675	-1.00545
RBM25	-0.232625	0.22222	-1.00541
HOXC12	0.05975	0.02574	-1.0053
GJD3	-0.0249	-0.627045	-1.00524
SIRT7	-0.44965	-0.36482	-1.00507
AFF4	0.706145	-0.232934	-1.0037
LRCH2	-0.086185	0.0561275	-1.003
ARNTL	0.6075	-0.197445	-1.00297
GAS6	-0.04458	-1.29863	-1.00292
HADHA	1.02994	0.396076	-1.00285
KLHDC8B	0.501085	-0.201056	-1.00258
ITGAX	-0.12243	-0.7492	-1.00255
FAM82A2	0.188345	-0.279975	-1.00244
SLC25A26	0.4774	-0.582135	-1.00229
ODZ3	0.87647	0.2411	-1.00228
C6orf165	-0.83303	0.0491112	-1.00218
ZXDB	-0.15131	0.440585	-1.00186
OR11H6	-0.22521	-2.14855	-1.00151
SLCO2B1	-0.65543	0.589405	-1.00123
LRFN2	0.86898	-1.3702	-1.00102
PGS1	0.155227	-0.428446	-1.00059
TECPR1	-1.49645	-0.712165	-1.00039
ARHGAP28	-0.733665	0.2502	-1.00038
EAF2	0.9962	-1.30015	-1.00014
SRSF2	-1.06334	0.770425	-0.999815
NUFIP2	1.47405	-0.273685	-0.99968
AKR7L	0.90038	-1.33766	-0.999665
ARMC7	-0.437665	0.37616	-0.999545
RNF111	2.5155	-0.578865	-0.999485
FAM55B	1.2573	-1.5968	-0.99947
PAX1	-0.165922	-0.193089	-0.999302
ZBTB12	-0.263705	-0.418475	-0.999005
PSG11	-1.46727	-0.482639	-0.998895
GPRIN2	0.385368	-0.83587	-0.998865
SYT9	-0.071775	-0.435437	-0.99825
AZGP1	-0.80201	-0.63997	-0.9982
FBXW9	-0.11466	-0.58616	-0.99804
LARGE	0.65456	-0.398357	-0.998025
ZFYVE27	0.38579	-0.39917	-0.997645
CALD1	0.757925	0.091675	-0.997115
MED7	0.537695	0.70016	-0.996935
LINC00478	0.77402	-1.38379	-0.99674
PSORS1C1	0.0863285	-0.64439	-0.99643
RETNLB	-1.13479	-0.130765	-0.99631
GPC3	0.96772	-0.882425	-0.99625
FAM54B	-0.52057	-2.3146	-0.99621
CXCR4	0.111759	-0.54577	-0.99618
WNT9A	-0.08389	-1.02025	-0.99616
MAP3K5	0.731055	-1.01169	-0.996085
HTR3E	-0.288905	0.586775	-0.99608
SSR2	0.68789	0.0576135	-0.99608
ASCL4	-1.1608	-1.3201	-0.995955
TMEM202	1.13851	0.366432	-0.995925
IL36RN	0.58721	-0.47322	-0.995915
KLHL4	0.362915	0.267655	-0.99504
FAM18A	0.165969	-0.996885	-0.994925
FBXO41	-0.654715	-0.972945	-0.994915
GRIN2A	1.28049	-1.06557	-0.99487
LRIT2	0.416365	-0.943795	-0.99486
CNGA2	0.549735	-1.60315	-0.99443
HS3ST3B1	-0.031555	-0.58625	-0.994305
SECISBP2L	-0.421085	0.391236	-0.994175
CECR5	0.500535	-0.454105	-0.993925
SEC61G	0.27098	-0.67656	-0.9937
VAMP8	0.331225	-0.176595	-0.99365
CDYL2	-0.183394	-1.28819	-0.993585
CCDC155	-0.313285	-0.280915	-0.99312
RASL10A	-0.301295	-1.7619	-0.992795
DDO	-0.113345	-0.249409	-0.99259
ATN1	1.19302	-0.318785	-0.99239
ACVR2A	-0.182125	-0.459853	-0.992225
MAN2C1	0.683335	0.247705	-0.99196
EXOSC4	0.02887	0.51991	-0.991525
FKBP2	1.7995	-1.05801	-0.991485
PMEL	1.31505	0.28149	-0.991415
FLG	1.20439	-1.31985	-0.99134
ACACB	0.424085	-0.84085	-0.991065
KBTBD6	1.731	-0.61001	-0.99095
OR4S2	0.271035	0.857365	-0.9908
RWDD2A	-0.8221	-0.959435	-0.99067
IL17B	0.87565	0.05285	-0.99055
HMP19	0.161805	-2.03595	-0.99019
VAC14	-0.116205	-0.63188	-0.98987
TSEN15	0.056005	-0.48109	-0.98972
POLR1A	0.33188	-1.00314	-0.98967
CD34	0.961705	-0.006595	-0.98961
BPI	-1.11988	0.141	-0.98961
OR4K5	-1.181	-3.2369	-0.989425
KDELR1	0.40203	-1.33252	-0.98909
WDR66	1.13072	-0.50689	-0.98907
PXMP2	-0.14496	0.09286	-0.989045
GABRA5	0.49199	-0.926218	-0.988675
VMO1	0.10118	-0.360295	-0.9878
SLC38A1	-0.45088	0.740555	-0.987315
PRRC2C	0.40149	-1.1562	-0.98728
ABCG1	-1.39075	0.69955	-0.98713
BOD1L	0.710555	-1.00621	-0.98691
SLC22A10	-1.11353	-1.51971	-0.98682
SGSM2	0.06509	-0.460383	-0.98681
ACOT7	0.06716	0.134165	-0.98676
RP1	0.46201	-0.77797	-0.98664
ZNF79	0.94191	-0.93917	-0.986575
ZNF214	0.90263	-0.72174	-0.986495
GDF2	-0.96969	0.204842	-0.986465
TMEM184C	0.262619	-0.049675	-0.98617
B4GALT5	0.16771	0.4547	-0.985815
ARAP3	-0.45156	-1.04162	-0.98575
WIPI2	-1.1203	-0.31659	-0.98568
MTMR9	-0.50234	1.01292	-0.985485
SLC9A8	-0.076545	-1.6468	-0.98525
MCM3	0.697035	-0.97201	-0.985235
SSR3	0.0880155	-0.26777	-0.98507
C19orf75	-1.04408	-2.11305	-0.98439
PPEF2	-0.0739605	-0.90975	-0.984275
DMTF1	-0.125995	-0.90329	-0.98411
DOK4	0.27869	-1.17026	-0.983985
NR1H3	-1.04019	0.614175	-0.98377
TMEM82	-1.53655	-0.392645	-0.983625
DSCR3	-0.38259	-0.258337	-0.983545
CRCP	1.32946	-1.24395	-0.983515
CPEB3	-0.593735	0.32162	-0.98341
BYSL	-1.74175	1.47875	-0.983385
INHBB	-0.09005	0.78423	-0.983365
FSTL1	0.678895	-0.972215	-0.983145
ZMAT1	-0.77254	-0.18923	-0.982895
KLK12	-0.08207	-1.08318	-0.98287
HAVCR1	0.39945	0.107915	-0.982855
SIAH3	0.163745	0.0308	-0.982475
FBXL13	0.63957	-0.259877	-0.9823
FBXL4	0.864685	-1.59575	-0.981675
HLA-DOA	0.494925	-0.862545	-0.98152
PRKAR1B	-0.039225	-1.02155	-0.981175
ITCH	0.17888	0.46789	-0.981135
FAM100B	-0.657955	-1.72455	-0.98105
GNRH1	-0.102015	-1.05689	-0.98104
FXR1	1.01676	-0.110125	-0.980775
LINS	-0.201793	-1.23969	-0.98065
TTLL6	-1.23945	-0.728725	-0.980335
FNDC4	-0.0962395	-0.82549	-0.980325
SLC34A3	0.486685	-0.105135	-0.980175
MRPS26	-1.9041	-0.32456	-0.97969
PASD1	-1.89769	-1.55702	-0.97964
C15orf42	-1.3403	0.791895	-0.9792
FZD1	0.44991	-0.475965	-0.979175
RPA1	-0.6252	0.792955	-0.97917
SHFM1	-1.6539	-1.8623	-0.97914
TAAR1	-0.344485	-0.19227	-0.978905
DIDO1	1.35855	-0.295125	-0.97887
ALKBH4	-1.3419	0.405525	-0.978595
HYAL1	0.21147	0.744095	-0.978585
NEFM	-0.29012	-0.81308	-0.978235
PDDC1	0.39905	-0.40623	-0.978155
VMA21	-0.2164	-1.6727	-0.97784
ST6GALNAC2	0.508357	-0.06505	-0.97773
S100PBP	-0.504955	-1.05061	-0.97746
RINL	-0.031565	-0.54841	-0.97731
XPNPEP3	-0.37211	-1.16495	-0.977135
METTL11A	-0.507332	0.05739	-0.977035
EDC4	-0.215921	-0.718735	-0.976995
DDAH2	0.772875	-0.139048	-0.97686
EPHA7	0.813795	0.82015	-0.97665
LHX1	0.489865	-0.06996	-0.9765
TTLL1	-1.22836	-0.6858	-0.976405
RGS8	-0.03558	-0.73695	-0.976105
PRLH	-1.5835	-1.36406	-0.97605
C14orf102	-0.08581	-1.4891	-0.9759
PSMB7	-0.3557	0.279744	-0.975675
CCDC132	1.32915	-0.750865	-0.97559
FAM131B	-0.396095	-1.21	-0.975435
DOK1	-0.89609	-0.043295	-0.97525
FOXR1	1.09241	-0.966795	-0.975245
ACER3	1.0032	0.234375	-0.97515
CEP19	-0.244912	-1.5859	-0.974715
PIK3AP1	-0.69841	-0.251755	-0.974695
NEK5	0.675855	0.04261	-0.974575
ZNF774	0.96501	-1.73345	-0.974265
TYK2	0.64089	-1.15575	-0.974155
APOB	-0.03313	-1.08277	-0.97408
CDH13	-0.447715	-1.00774	-0.973925
RMI2	-0.262806	-0.102506	-0.973755
METRNL	1.04965	0.66259	-0.97351
PIGA	-0.64975	0.975565	-0.97311
SLC35E1	0.55535	1.43505	-0.973065
RAB40C	0.502455	-1.27963	-0.97263
NGDN	-1.28588	-0.298958	-0.97232
HTN1	0.832765	-1.44885	-0.972125
C3orf27	0.62593	-0.184115	-0.971925
CDC37	0.743665	-1.21713	-0.97184
ZNF165	1.8844	-0.109845	-0.97145
ZNF189	1.11867	-0.378155	-0.97128
LMNB1	1.97385	-0.02116	-0.971165
PPOX	-0.38116	0.253215	-0.970045
U2AF1L4	2.07475	-0.398035	-0.96959
SV2A	-0.044945	-0.397663	-0.969475
ACVR1	-0.707205	0.72334	-0.96939
OR1J2	1.6844	-0.49514	-0.969295
PHACTR4	0.265525	-0.483525	-0.96929
RALY	-1.49005	1.31126	-0.96912
ZNF154	0.395461	-0.751135	-0.968415
CDC45	-0.35349	-0.607685	-0.96798
ART5	0.815625	-1.40708	-0.967925
STT3B	0.186365	-0.94372	-0.96788
CSDC2	0.038005	-0.89872	-0.96784
IFI16	-0.20739	-0.39719	-0.967825
RGS5	0.72881	-0.110424	-0.967405
C6orf125	-0.348985	1.05955	-0.9674
CD3D	0.410255	-0.22308	-0.967285
FOXI1	0.230435	-0.818925	-0.96714
GYPA	0.571915	-1.03	-0.96691
CNTD1	-0.524002	-1.4997	-0.966805
CAMKV	0.333345	-1.31502	-0.96591
USP20	-0.526161	-0.0540922	-0.965855
C22orf28	0.8373	-1.32849	-0.965345
PPWD1	0.61049	-1.01601	-0.965135
SAT2	0.32374	-0.347884	-0.96504
GSC	-0.258809	-0.48637	-0.965005
GUCY1A3	1.11486	-0.483795	-0.96481
SIGLEC5	-0.493085	-0.60518	-0.964785
HHLA2	0.472835	-0.11237	-0.96437
FAM47C	0.492829	-0.032395	-0.964225
OR5D18	1.00791	-0.96941	-0.964095
TRAF6	0.91936	0.187265	-0.964055
MED11	-1.83305	-0.492144	-0.963975
TRIM5	1.3169	-0.56784	-0.96351
JRKL	-0.943465	-1.05773	-0.96349
SLC9A4	-0.0752725	0.196885	-0.96345
SYNGAP1	-0.474935	1.00432	-0.963245
SNAPC2	0.34922	-1.61915	-0.96264
FAM155B	0.72875	0.18369	-0.962545
TARSL2	0.763	-1.3233	-0.962475
ZNF558	-0.537149	-1.13306	-0.96236
SLC27A5	0.032185	-0.03541	-0.962325
OR13J1	0.10956	1.01995	-0.962275
AWAT1	0.019909	-1.12411	-0.96197
TNFRSF11A	0.66653	-0.01036	-0.96194
JAG2	-1.17139	0.068734	-0.96192
HMBS	0.44977	0.364615	-0.961505
GPD1	-0.736635	0.331049	-0.96147
SCUBE3	0.00043	0.060745	-0.961135
WT1-AS	-0.212905	-1.2306	-0.96092
PCDH15	0.76935	-1.47174	-0.96071
NOC3L	0.50989	1.06963	-0.960575
WDR86	-0.319221	-0.035235	-0.960325
TDRD1	0.33839	-1.17256	-0.960255
GSR	0.20904	-1.07344	-0.96008
PRRX1	-0.26713	-0.1817	-0.959925
LRRC45	-0.390775	-2.6733	-0.959685
MLL5	-0.49247	0.134255	-0.95945
ATP6V1A	0.66621	-0.878385	-0.959335
SNAP25	0.047735	0.87318	-0.95905
CCR2	0.157148	-1.39685	-0.959035
BRI3	1.15235	-0.0545305	-0.95891
PICK1	0.663945	0.47735	-0.958055
CAPNS1	1.21118	-1.32641	-0.95802
NDRG2	1.07677	-1.3225	-0.957155
ZNF33A	0.15591	-0.41471	-0.9569
PCYT1B	0.670315	-0.555685	-0.956805
MR1	-0.00242	-0.303263	-0.956635
ALPK1	0.128035	-0.273585	-0.95659
TBC1D23	0.935915	-0.397785	-0.956435
ZNHIT6	-0.0113808	-0.715685	-0.956275
ICAM3	-0.222885	-0.524215	-0.955805
COG2	0.07275	-0.77336	-0.95577
OR4K17	-0.677464	-0.510055	-0.95555
IL25	0.072595	0.236165	-0.955435
LGALS12	0.733715	-0.05393	-0.9554
ZBED1	0.343475	-0.430739	-0.955335
NIPAL1	0.606891	-0.725535	-0.95529
BEAN1	-0.220463	1.9697	-0.95492
HPS1	0.261103	-1.00875	-0.95473
AAMP	1.10182	-1.26665	-0.954515
KIAA1267	-1.03363	-1.74415	-0.9545
LRRC48	-0.302575	-0.447797	-0.95406
ZNF596	0.931355	0.0405595	-0.953885
CHUK	0.3524	0.466673	-0.953575
TESK2	0.8921	0.588878	-0.95354
SFRP5	0.02831	0.727535	-0.953465
DACT2	-0.724365	0.45108	-0.953405
C3orf54	0.528977	-0.24203	-0.9534
ZBTB5	0.147981	-1.14465	-0.953205
SLC46A1	-1.19954	-0.502325	-0.95302
B9D1	-0.132395	-0.012009	-0.9528
DOK7	0.745555	-1.7487	-0.95275
CST5	-1.81405	0.892545	-0.95243
TMEM8B	0.611125	-0.675545	-0.952065
LSM10	0.041345	-0.92437	-0.951865
ZNF226	0.74301	0.201745	-0.95172
EVI5	0.732325	-0.53955	-0.951695
C9orf21	-0.509465	0.735937	-0.95168
CTSG	-0.352035	-1.0152	-0.951595
[truncated: 13,039 more rows]
